1  
2  
3  
4  
5  
6  
7  
8  
9  
10  
11  
12  
13  
14  
15  
16  
17  
18  
19  
20  
21

**TITLE**

*Aedes aegypti* (Aag2)-derived clonal mosquito cell lines reveal the impact of pre-existing persistent infection with the insect-specific bunyavirus Phasi Charoen-like virus on arbovirus replication

**SHORT TITLE**

Persistent PCLV infection does not alter arbovirus replication

Anthony C. Fredericks<sup>1\*</sup>, Louisa E. Wallace<sup>2\*</sup>, Tiffany A. Russell<sup>2</sup>, Andrew D. Davidson<sup>3</sup>, Ana Fernandez-Sesma<sup>1#</sup>, Kevin Maringer<sup>1,2,3#</sup>

<sup>1</sup> Department of Microbiology, Icahn School of Medicine at Mount Sinai, New York, NY USA

<sup>2</sup> Department of Microbial Sciences, Faculty of Health and Medical Sciences, University of Surrey, Guildford, United Kingdom

<sup>3</sup> School of Cellular and Molecular Medicine, University of Bristol, Bristol, United Kingdom

\* These authors contributed equally to this work

# To whom correspondence should be addressed: k.maringer@surrey.ac.uk, ana.sesma@mssm.edu

Kevin Maringer ORCID: 0000-0003-0977-8807

22

## ABSTRACT

23           **Background:** *Aedes aegypti* is a vector mosquito of major public health importance,  
24 transmitting arthropod-borne viruses (arboviruses) such as chikungunya, dengue, yellow fever  
25 and Zika viruses. Wild mosquito populations are persistently infected at high prevalence with  
26 insect-specific viruses that do not replicate in vertebrate hosts. In experimental settings, acute  
27 infections with insect-specific viruses have been shown to modulate arbovirus infection and  
28 transmission in *Ae. aegypti* and other vector mosquitoes. However, the impact of persistent  
29 insect-specific virus infections that more closely mimic the situation in nature has not been  
30 investigated extensively. Cell lines are useful models for studying virus-host interactions,  
31 however the available *Ae. aegypti* cell lines are poorly defined and heterogenous cultures.

32           **Methodology/Principle Findings:** We generated single cell-derived clonal cell lines  
33 from the commonly used *Ae. aegypti* cell line Aag2. Two of the fourteen Aag2-derived clonal  
34 cell lines generated harboured markedly and consistently reduced levels of the insect-specific  
35 bunyavirus Phasi Charoen-like virus (PCLV) known to persistently infect Aag2 cells. In  
36 contrast to studies with acute insect-specific virus infections in cell culture and *in vivo*, we  
37 found that pre-existing persistent PCLV infection had no major impact on the replication of the  
38 flaviviruses dengue virus and Zika virus, the alphavirus Sindbis virus, or the rhabdovirus  
39 vesicular stomatitis virus. We also performed a detailed characterisation of the morphology,  
40 transfection efficiency and immune status of our Aag2-derived clonal cell lines, and have made  
41 a clone that we term Aag2-AF5 available to the research community as a well-defined cell  
42 culture model for arbovirus-vector interaction studies.

43           **Conclusions/Significance:** Our findings highlight the need for further *in vivo* studies  
44 that more closely recapitulate natural arbovirus transmission settings in which arboviruses  
45 encounter mosquitoes harbouring persistent rather than acute insect-specific virus infections.  
46 Furthermore, we provide the well-characterised Aag2-derived clonal cell line as a valuable  
47 resource to the arbovirus research community.

48  
49  
50  
51  
52  
53  
54  
55  
56  
57  
58  
59  
60  
61  
62  
63  
64  
65  
66  
67  
68  
69  
70  
71

## AUTHOR SUMMARY

Mosquito-borne viruses usually only infect humans through the bite of a mosquito that carries the virus. Viruses transmitted by the ‘yellow fever mosquito’ *Aedes aegypti*, including dengue virus, Zika virus, yellow fever virus and chikungunya virus, are causing an ever-increasing number of human disease cases globally. Mosquito-borne viruses have to infect and replicate inside the mosquito before they are transmitted to humans, and the presence of other infectious agents can change the efficiency of virus transmission. Mosquitoes are known to be infected with ‘insect-specific viruses’ that only infect mosquitoes and cannot cause human disease. We have shown here that in laboratory cell cultures derived from the *Aedes aegypti* mosquito, pre-existing infection with an insect-specific virus called Phasi Charoen-like virus does not affect the infection and growth of the mosquito-borne viruses dengue virus, Zika virus, Sindbis virus or vesicular stomatitis virus. Compared to previous research, our research is more reflective of conditions that mosquito-borne viruses encounter in nature, and our results provide important new insights into whether and how insect-specific viruses affect mosquito-borne virus transmission. Ultimately, this information could inform ongoing research into whether insect-specific viruses could be used to prevent the transmission of mosquito-borne viruses to reduce global disease burdens.

72

## INTRODUCTION

73 Arthropod-borne viruses (arboviruses) are a major public health concern worldwide,  
74 with many considered emerging or re-emerging pathogens [1]. Significant taxons to which  
75 arboviruses belong include the positive-sense single-stranded RNA (+ssRNA) families  
76 *Flaviviridae* (genus *Flavivirus*) and *Togaviridae* (genus *Alphavirus*), and the negative-sense  
77 single-stranded RNA (-ssRNA) order *Bunyavirales* and family *Rhabdoviridae* (genus  
78 *Vesiculovirus*). Many arboviral taxons also include related insect-specific viruses that can  
79 infect vector insects but not vertebrate hosts [2,3]. Arboviruses transmitted by the vector  
80 mosquito *Aedes aegypti* are of particular concern to human health, as this mosquito species  
81 thrives in urban environments and is highly anthropophilic, feeding primarily on humans [4].  
82 *Ae. aegypti* is the primary vector for the emerging and re-emerging flaviviruses dengue virus  
83 (DENV), yellow fever virus (YFV) and Zika virus (ZIKV), and the alphavirus chikungunya virus  
84 (CHIKV) [5].

85 Vector competence is the intrinsic ability of an arthropod to be infected with and  
86 transmit vector-borne pathogens [6]. Vector competence varies between individuals and  
87 populations based on many factors, including the combination of pathogen and vector  
88 genotype, co-infection status of the vector with other microbes, and other environmental  
89 factors [4,7-9]. There is widespread interest in understanding the underlying mechanisms  
90 influencing vector competence to gain a better understanding of how arboviruses are  
91 transmitted and emerge on a global and local scale, especially because this knowledge could  
92 aid the development of mosquitoes unable to transmit arboviruses of human public health  
93 concern. For example, mosquitoes harbouring the obligate intracellular bacteria *Wolbachia*  
94 *spp.* are less able to transmit DENV and other arboviruses [10-13] and are being released in  
95 endemic settings to test their impact on human disease burdens [14]. Similarly, insect-specific  
96 viruses have also been proposed as potential biocontrol agents to reduce arbovirus  
97 transmission [2,15].

98 Insect-specific viruses are highly prevalent in wild mosquito populations [16-28], with  
99 a number of studies investigating whether insect-specific viruses influence vector competence  
100 [reviewed in 15]. There is no consensus on how insect-specific viruses affect arbovirus  
101 replication in tissue culture or *in vivo*, with the experimental outcome varying depending on  
102 the combination of arbovirus, insect-specific virus and mosquito species (and potentially the  
103 specific mosquito line or cell line used), as well as other variations in the experimental set up  
104 [15]. Thus, previous studies have found insect-specific viruses to either increase [29,30],  
105 decrease [19,31-40] or have no effect [31,35,40-42] on the replication of various arboviruses  
106 across different mosquito species and cell lines. The majority of these studies were performed  
107 in the context of acute insect-specific virus infection, which may not accurately recapitulate  
108 the effects of the persistent insect-specific virus infections more commonly encountered in  
109 nature.

110 To our knowledge, there are no *in vivo* studies on the impact of persistent insect-  
111 specific virus infection on arbovirus replication in *Aedes spp.* Of the *in vitro* studies that tested  
112 arbovirus replication in *Aedes spp.*-derived cell lines in which persistent insect-specific virus  
113 infection was maintained over multiple cell passages, Burivong *et al.* found that DENV  
114 replication was reduced in the presence of persistent but not acute co-infection with *Aedes*  
115 *albopictus* densovirus (AalDV; family *Parvoviridae*) in the *Ae. albopictus* cell line C6/36 [40].  
116 This highlights the differential effects persistent and acute insect-specific virus infections can  
117 have on arbovirus replication. Meanwhile, Fujita *et al.* showed that persistent infection with  
118 Shinobi tetravirus (SHTV; family *Permutotetraviridae*) and Menghai rhabdovirus (MERV;  
119 family *Rhabdoviridae*) alone and in combination reduce ZIKV replication in C6/36 cells, with  
120 the two viruses combined also suppressing the replication of the flaviviruses DENV and  
121 Japanese encephalitis virus (JEV) [39]. Both studies may not fully recapitulate the conditions  
122 encountered in nature, since C6/36 cells are immunocompromised [43], and the mosquito  
123 immune system is known to pose a barrier to arboviral infection, within-vector dissemination  
124 and transmission [44-48], and is a known contributor to the observed variability in vector

125 competence [44,47]. Notably, Parry and Asgari observed only a modest reduction in DENV  
126 replication in the *Ae. aegypti* Aa20 cell line in the presence of Aedes anphevirus (AeAV; order  
127 *Mononegavirales*) [19]. Therefore, further studies into whether and how persistent infection  
128 with insect-specific viruses might modulate arbovirus replication *in vivo* or in  
129 immunocompetent *Aedes spp.* cell lines are needed.

130         The *Ae. aegypti*-derived cell line Aag2 is one of the most commonly used cell lines for  
131 studies into virus-vector interactions in tissue culture. One of the benefits of Aag2 cells is that  
132 they are immunocompetent [49,50]. A major antiviral immune response in mosquitoes is the  
133 RNA interference (RNAi) pathway, in which viral double-stranded RNAs (dsRNAs) are  
134 processed by Dicer-2 into small interfering RNAs (siRNAs) that are loaded into the RNA-  
135 induced silencing complex (RISC) to target and degrade viral RNAs and thus reduce viral  
136 replication and spread [51]. In addition, innate immune pathways such as the Janus kinase-  
137 signal transducer and activator of transcription (Jak-STAT) pathway and nuclear factor kappa-  
138 light-chain-enhancer of activated B cells (NF- $\kappa$ B)-regulated Toll and immunodeficiency (IMD)  
139 pathways regulate the expression of antimicrobial peptides that are induced upon microbial  
140 stimulation [51].

141         The Aag2 cell line was originally generated in the 1960's by Peleg from whole  
142 homogenised embryos, and has been referred to as 'Aag2' since the 1990's when Lan and  
143 Fallon adapted the culture for growth in E-5 medium [52]. Cells within the culture exhibit  
144 differing morphologies (Fig 1A), and it has been suggested that the varying morphologies of  
145 mosquito cells in culture may be indicative of the presence of a diversity of embryonic and  
146 differentiated cell types [53,54]. Furthermore, Aag2 cells are known to be persistently infected  
147 with a number of insect-specific viruses. Cell fusing agent virus (CFAV; family *Flaviviridae*,  
148 genus *Flavivirus*) was the first insect-specific virus discovered and has long been known to  
149 persistently infect Aag2 cells and other *Ae. aegypti* cell lines [3,55,56]. In addition, we  
150 previously discovered Aag2 cells to be persistently infected with the insect-specific virus Phasi  
151 Charoen-like virus (PCLV; order *Bunyvirales*, family *Phenuiviridae*, genus *Phasivirus*) [57].

152 CFAV and PCLV both circulate in *Ae. aegypti* in the wild [16,17,25], and may have entered  
153 the cell line during its establishment or later on from an infected laboratory mosquito colony  
154 or environmental sample. While some research groups have found their Aag2 cell lines to also  
155 be persistently infected with the insect-specific viruses AeAV [19] or Culex Y virus [58], this is  
156 not the case for our Aag2 cells [57].

157         Here, we single-cell sorted Aag2 cells to generate clonal Aag2-derived cell lines so as  
158 to provide a better-defined homogeneous Aag2-derived cell line for the research community,  
159 and as a starting point for our own CRISPR experiments [59,60]. Although we initially selected  
160 clonal cell lines exhibiting different morphologies corresponding to those observed within the  
161 original Aag2 cell line (herein referred to as the 'parental' Aag2 cell line), these morphologies  
162 were not stable and all cell lines reverted to the parental Aag2 cell morphology. This suggests  
163 that the various cell morphologies observed in Aag2 cell cultures do not represent  
164 fundamentally different cell types. Furthermore, two of the clones selected for further  
165 characterisation were found to be 'cured' of PCLV, or at least harboured markedly and  
166 consistently reduced levels of PCLV. We used these clones to test the effect persistent (rather  
167 than acute) insect-specific virus infection has on superinfection with DENV, ZIKV, Sindbis  
168 virus (SINV) and vesicular stomatitis virus (VSV), and observed no notable reproducible  
169 impact on the replication of these arboviruses. Finally, we characterised a clone we termed  
170 'Aag2-AF5' in further detail, and have provided this to the research community as a more well-  
171 defined version of the parental Aag2 cell line via the European Collection of Authenticated Cell  
172 Cultures (ECACC) ([phe-culturecollections.org.uk](http://phe-culturecollections.org.uk)). Our findings provide important insights into  
173 the impact that insect-specific viruses have on mosquito vector competence for arboviruses  
174 in an experimental set up that more accurately mimics conditions encountered by arboviruses  
175 in nature, with implications for the potential use of insect-specific viruses as biocontrol agents  
176 for reducing arbovirus transmission. Furthermore, our single cell-derived clone Aag2-AF5  
177 represents a much needed standardised and well-defined *Ae. aegypti* cell line that will benefit  
178 the vector research community.

179

## METHODS

180

### Cells

181 Aag2 cells were a kind gift from Raul Andino (University of California, San Francisco,  
182 CA USA), and were maintained in Leibovitz's L-15 medium supplemented with 2 mM  
183 glutamine (Sigma-Aldrich, St. Louis, MO USA), 0.1 mM non-essential amino acids (Sigma-  
184 Aldrich), 10% (v/v) tryptose phosphate broth (Sigma-Aldrich), 100 U/ml penicillin, 100 µg/ml  
185 streptomycin and 10% (v/v) foetal bovine serum (FBS) at 28°C in a humidified atmosphere  
186 without CO<sub>2</sub>. In our hands, the source of FBS is critically important for culturing Aag2 cells and  
187 derived clones, with ThermoFisher Scientific (Waltham, MA USA) product number 94000014  
188 being optimal. C6/36 cells were a kind gift from Jorge Munoz-Jordan (Centers for Disease  
189 Control and Prevention, San Juan, Puerto Rico), and were maintained in Roswell Park  
190 Memorial Institute (RPMI) medium supplemented with 0.15% (w/v) sodium bicarbonate  
191 (Sigma-Aldrich), 0.1 mM non-essential amino acids, 2 mM L-glutamine, 1 mM sodium  
192 pyruvate and 10% (v/v) FBS at 33°C in a humidified atmosphere with 5% CO<sub>2</sub>. Baby hamster  
193 kidney (BHK) cells were a kind gift from Sujana Shresta (La Jolla Institute for Allergy and  
194 Immunology, La Jolla, CA USA), and were maintained in minimal essential medium (α-MEM)  
195 GlutaMAX supplemented with 10% (v/v) FBS, 100 U/ml penicillin, 100 µg/ml streptomycin,  
196 and 10 mM HEPES at 37°C in a humidified atmosphere with 5% CO<sub>2</sub>. Unless stated, reagents  
197 were from ThermoFisher Scientific. Madin Darby Canine Kidney (MDCK) cells were obtained  
198 from the American Type Culture Collection (ATCC) (Manassas, VA USA).

199

### Viruses

200 DENV serotype 2 (DENV-2) strain 16681 [61] was a kind gift from Richard Kinney  
201 (Arbovirus Disease Branch, Centers for Disease Control and Prevention, Fort Collins, CO  
202 USA). ZIKV strain MR766 [62] was obtained from ATCC. Green fluorescent protein (GFP)-  
203 expressing SINV, based on clone dsTE12Q [63,64], was a kind gift from Christopher Basler  
204 (Georgia State University, Atlanta, GA USA). VSV was the Indiana strain and expresses GFP



205 [65], and was a kind gift from Adolfo Garcia-Sastre (Icahn School of Medicine at Mount Sinai,  
206 New York, NY USA). GFP-expressing Newcastle disease virus (NDV), based on clone  
207 Hitchner B1 [66], was a kind gift from Christopher Basler. DENV-2 and ZIKV were routinely  
208 grown on C6/36 cells at 33°C, and SINV and VSV were routinely grown on BHK cells at 37°C,  
209 in cell culture medium supplemented with 2% (v/v) FBS. Briefly, for ZIKV, SINV and VSV,  
210 confluent cell monolayers were infected at multiplicity of infection (MOI) 0.05 one day post-  
211 seeding. Culture supernatant was harvested seven (ZIKV) or two (SINV, VSV) days post-  
212 infection and clarified by centrifugation before storage, titration and use in experiments. For  
213 DENV-2, C6/36 cells were seeded at  $1 \times 10^6$  cells per 75 cm<sup>2</sup> culture flask and infected one  
214 day later at MOI 0.5; virus was harvested seven days post-infection as described above.

215 For one-step growth curves, Aag2 cells were seeded at  $5 \times 10^5$  cells/well in 12-well  
216 plates (DENV-2),  $3 \times 10^5$  cells/well in 24-well plates (SINV, VSV) or  $1 \times 10^5$  cells/well in 96-  
217 well plates (ZIKV) and infected the next day by replacing culture medium with inoculum in  
218 phosphate-buffered saline (PBS). Inoculum was removed after 1 h and cells were washed  
219 once in PBS before adding fresh culture medium. To compare virus replication in Aag2-  
220 derived clonal cell lines, cells were seeded at  $1 \times 10^5$  cells/well in 96-well plates and infections  
221 performed as above. All viruses were titrated on confluent BHK cells one day post-seeding in  
222 culture medium containing 2% (v/v) FBS and 0.5% (w/v) methyl cellulose (Sigma Aldrich). For  
223 DENV-2 titrations, cells were moved to 33°C during and following infection. Titrations were  
224 fixed six (DENV-2) or three (ZIKV, SINV, VSV) days post-infection in 1% crystal violet solution  
225 in 20% ethanol following removal of the methyl cellulose overlay.

## 226 **Bacteria**

227 *Escherichia coli* DH5 $\alpha$  (ThermoFisher Scientific) were cultured overnight at 37°C with  
228 shaking in Luria Bertani (LB) medium (Sigma Aldrich) without antibiotics, and titrated on LB  
229 agar in 6-well plates overnight at 37°C. *Listeria monocytogenes* cultures were a kind gift from  
230 Adolfo Garcia-Sastre and *Staphylococcus aureus* cultures were a kind gift from Flora Samaroo

231 (Icahn School of Medicine at Mount Sinai); both were cultured and titrated in brain heart  
232 infusion broth/agar (Sigma Aldrich) as for *E. coli*. Bacteria were pelleted, washed once in PBS  
233 and resuspended in PBS before heat-inactivation at 60°C for 3 h (*E. coli*, *L. monocytogenes*)  
234 or at 75°C for 6 h (*S. aureus*).

## 235 **Plasmids**

236 The GFP expression vector pEx-EGFP [67] was a kind gift from Doug Brackney (The  
237 Connecticut Agricultural Experiment Station, New Haven, CT USA). The constitutive firefly  
238 luciferase expression plasmid pKM19 was generated by amplifying the firefly luciferase gene  
239 from pLUC-MCS (Agilent Technologies, Santa Clara, CA USA) and cloning it into pEx-EGFP  
240 after the enhanced GFP (EGFP) sequence was removed by digestion with XhoI and NcoI,  
241 using In-Fusion cloning (Takara Biosciences, Mountain View, CA USA). The constitutive  
242 *Renilla* luciferase expression plasmid pKM50 was generated by amplifying the *Ae. aegypti*  
243 ubiquitin UbL40 promoter from pSLfa-UbL40-EGFP [68] (a kind gift from Raul Andino) and  
244 cloned by In-Fusion into pRL-TK-Renilla (Promega, Madison, WI USA) after the TK promoter  
245 was removed by digestion with BglII and BstBI. pKM19 and pKM50 have been made available  
246 via Addgene (addgene.org, Watertown, MA USA) with reference numbers 123655 and 123656  
247 respectively.

## 248 **Single Cell Sorting of Aag2 Cells**

249 Prior to cell sorting, Aag2 cells were grown in Leibovitz's L-15 medium with  
250 supplements as described above, including 20% (v/v) FBS. Adherent cells were trypsinised,  
251 pelleted by centrifugation, washed once in PBS, pelleted again by centrifugation and  
252 resuspended at  $3\text{-}5 \times 10^6$  cells/ml in sterile PBS containing 1.25 µg/ml 4',6-diamidino-2-  
253 phenylindole dihydrochloride (DAPI; ThermoFisher Scientific) and stored on ice until required.  
254 Immediately prior to sorting, cells were passed through a 35 µm filter. Single cells were sorted  
255 on a FACS Aria II (BD Biosciences, San Jose, CA USA) using a 100 µm nozzle and a sheath  
256 pressure of 35 psi into individual wells of a 96-well plate each containing 200 µl Leibovitz's L-

257 15 medium with supplements as above including 20% (v/v) FBS. Cells were gated to select  
258 DAPI<sup>low</sup> (live) single cell clones (Fig 1B). Fast-growing clonal cell lines confluent after three  
259 weeks of growth were expanded and confirmed to be mycoplasma-negative using the Myco-  
260 Alert PLUS kit (Lonza, Basel, Switzerland) prior to freezing for long-term storage in liquid  
261 nitrogen. Clone Aag2-AF5 has been made available via ECACC (phe-  
262 culturecollections.org.uk; Public Health England, London, UK).

## 263 **Microscopy**

264 Images were captured using an EVOS XL Core (Fig 1) or EVOS FL (Fig 5) Cell Imaging  
265 System (ThermoFisher Scientific). To measure transfection efficiency, images were captured  
266 48 h after transient transfection with 300 ng pLex-EGFP per well of a 12-well plate, each  
267 containing  $1 \times 10^6$  cells, at the time of cell seeding using TransIT-insect transfection reagent  
268 (Cambridge Biosciences, Cambridge, UK) as per manufacturer's instructions. Transfection  
269 efficiency was calculated manually using Fiji (ImageJ) software (National Institutes of Health,  
270 Bethesda, MA USA) [69]. At least 900 individual cells were counted across three separate  
271 fields of view at 40X magnification for each experiment.

## 272 **PCR and RT-PCR**

273 To analyse the genomic integration of PCLV, total DNA or total RNA was extracted  
274 from  $1-3 \times 10^6$  cells using the Quick-DNA or Quick-RNA Miniprep Kits (Zymo Research, Irvine,  
275 CA USA) respectively, as per manufacturer's instructions. RNA samples were spiked with  
276 NDV prior to isolation. Nucleic acids were treated with DNase for 40 min at 37°C using the  
277 DNA-free DNA Removal Kit (ThermoFisher Scientific) or with RNase A (Sigma-Aldrich) for 1  
278 h at 37°C as per manufacturers' instructions. Nucleases were removed by re-purifying the  
279 nucleic acids as described above. cDNA was generated from RNA using the iScript cDNA  
280 Synthesis Kit (Bio-Rad, Hercules, CA USA) with random hexamers as per manufacturer's  
281 instructions. PCR amplification was performed using the HOT FIREPol EvaGreen qPCR  
282 Supermix Plus (no ROX) (Solis BioDyne, Tartu, Estonia) at 95°C for 10 min followed by 26

283 cycles of 95°C for 15 s and 60°C for 30 s, as per manufacturer's instructions. Primers (Sigma-  
284 Aldrich) were as follows; Rps7, prKM27F CCACGATCCCGCACTCTGA, prKM27R  
285 TACGCTTGCCGACGACTTCA; NDV, forward GACAATGCTTGATGGTGAAC, reverse  
286 CAATGCTGAGAGACAATAGGTC; PCLV L, prKM110F CACTGCTACACCGCCTAGAG,  
287 prKM110R TGACCTGTTGGCCTGTTGTT, prKM111F GCACCTTTAACAGGAGATGCAA,  
288 prKM111R ACTACGCCACAATGCGATGA, prKM112F GACTCCCCGATTGAGTAAAGAAC,  
289 prKM112R TCCAAGGAATCACTTTCTGATGC, prKM113F  
290 GTCGATTTGAAGAAGTAGGTGC, prKM113R TCTATCGGTGATGTGCGTTCC,  
291 prKM231F AGGAGGCACAAATCAAGGTAGT, prKM231R  
292 GCGAGCTCACTTTGATGAATGG, prKM232F AGCCAGAGAAAGCAAACCAGA, prKM232R  
293 TCCATGTCATCAGTGTGGTGT; PCLV M, prKM233F AGGCATGAAGACCTGGACTC,  
294 prKM233R GCATGCATCTGCTCTATGGG, prKM234F TTGCAGAGGAAGATCTCTGAGG,  
295 prKM234R TTCGCTTATCAGCCTGCAGTT, prKM235F GCCTGTCCCATCTGCGAAT,  
296 prKM235R AACCTGTGACTCGTGTGCAA, prKM236F AGCTGTTCTGGTAATGTTGTGGA,  
297 prKM236R TCTTCCAAGCAGGTTGGTTTG; PCLV S, prKM237F  
298 AGCAATAGATACGACTGCTAGTGA, prKM237R GCATTCATCTCCATACGCACA,  
299 prKM238F GCGTCATTCGTTTCGAGCAT, prKM238R TCAGCAGACGGAAATCGTTGT.

300 To test Aag2-derived clonal cell lines for the presence of insect-specific viruses, RNA  
301 was extracted from 1-3 x 10<sup>6</sup> cells using the Quick-RNA Miniprep Kit (Zymo Research) as per  
302 manufacturer's instructions. cDNA was synthesised using the Maxima H Minus First Strand  
303 cDNA Synthesis Kit (ThermoFisher Scientific) with random hexamers or gene-specific  
304 primers. PCR amplification was performed using the AccuPrime Taq High Fidelity DNA  
305 Polymerase (ThermoFisher Scientific) at 94°C for 2 min, followed by 35 cycles of 94°C for 30  
306 s, 58°C for 30 s and 68°C for 1 min, followed by a final extension at 68°C for 5 min, as per  
307 manufacturer's instructions. Primers were as follows; Rps7, prKM259F  
308 TGCTTTCGAGGGACAAATCGG, prKM259R AATTCGAACGTAACGTACGTCC; CFAV,  
309 prKM258F TCATCTTATGTTGCACATGGACGC, prKM258R

310 CACCCTCCGGAAATCCGATTG; PCLV L, prKM254F  
311 CATCAARRGATGAAGCCAGAGAAAG, prKM254R  
312 GTCTTTATGTTTTCTGTACAGCCATAAT; PCLV M, prKM256F  
313 AATGCAAACACTGTTCTTGCAGATTCTG, prKM256R GTAGCTTAAAATCTGCGTCGTTAGT;  
314 PCLV S, prKM257F AATATAAATATTCAAACACCCCAGTTATAAG, prKM257R  
315 TTCTGATCATTTAACATTCTCAGAGCTA.

### 316 RT-qPCR

317 To measure PCLV levels, RNA was extracted from  $1 \times 10^6$  cells using 1 ml TRIzol  
318 reagent (ThermoFisher Scientific) and treated with DNase for 40 min at 37°C using the DNA-  
319 free DNA Removal Kit, as per manufacturers' instructions. To measure immune gene  
320 induction, cells were seeded at  $1 \times 10^5$  cells/well in 96-well plates and stimulated one day later  
321 by replacing the culture medium with culture medium containing 1,000 colony-forming units  
322 (CFU)/cell heat-inactivated bacteria. RNA was isolated 24 h later using the Quick-RNA  
323 Miniprep Kit (Zymo Research) as per manufacturer's instructions. RNA was reverse  
324 transcribed using the iScript cDNA Synthesis Kit with random hexamers as per manufacturer's  
325 instructions. PCR amplification was performed using the HOT FIREPol EvaGreen qPCR  
326 Supermix Plus (no ROX) at 95°C for 10 min followed by 40 cycles of 95°C for 15 s and 60°C  
327 for 30 s, as per manufacturer's instructions. Primers were as follows; PCLV L, prKM110F/R  
328 (see above); Rps7 (Genbank accession number XM\_001660119), prKM27F  
329 CCACGATCCCGCACTCTGA, prKM27R TACGCTTGCCGACGACTTCA; Defensin D  
330 (XM\_001657239), prKM14F TGCACCGGGGCCATTAC, prKM14R  
331 CAGGTGGCCCGTTTCAGG; Cecropin B (XM\_001648640), prKM17F  
332 GAAGCTGGTCGGCTGAAGAA, prKM17R CAACGGGTAGTCCCTTCTGG; Cecropin D  
333 (XM\_001649131), prKM16F AGCTGTTCGCAATTGTGCTGT, prKM16R  
334 TACAACAACCGGGAGAGCCTT.

### 335 RNAi Assay

336 Cells were seeded at  $1 \times 10^5$  cells/well in 96-well plates and concurrently transiently  
337 transfected with 10 ng/well pKM50 (*Renilla*), 50 ng/well pKM19 (firefly luciferase) and 1 nM  
338 dsRNA directed against EGFP or firefly luciferase using TransIT-insect transfection reagent  
339 as per manufacturer's instructions. Cells were harvested and luciferase activity measured two  
340 days post-transfection. Transfections for measuring transfection efficiency by firefly luciferase  
341 expression were set up in the same way, without the addition of dsRNA.

342 dsRNAs were generated by PCR amplification from plasmid templates pIEx-EGFP  
343 (EGFP dsRNA; primers prKM57F  
344 TAATACGACTCACTATAGGGCGTAAACGGCCACAAGTTCA, prKM57R  
345 TAATACGACTCACTATAGGGGGCGGACTTGAAGAAGTCGT) or pKM19 (firefly luciferase  
346 dsRNA; primers prKM168F TAATACGACTCACTATAGGGCAATCCGGAAGCGACCAACG,  
347 prKM168R TAATACGACTCACTATAGGGTTCCGCCCTTCTTGGCCTTT). Primers contain a  
348 5' T7 polymerase promoter used for *in vitro* transcription from gel purified amplicons using the  
349 MEGAshortscript *in vitro* transcription kit (ThermoFisher Scientific). dsRNA was gel purified  
350 prior to use.

### 351 **Bioinformatic Analysis of PCLV Insertions in Aag2 Genome**

352 Our previously published full-length PCLV genome sequences from Aag2 cells  
353 (Genbank accession numbers KU936055, KU936056 and KU936057) [57] were searched  
354 against the Aag2 cell reference genome [70] using the BLAST function at vectorbase.org [71].

### 355 **Statistics**

356 Heteroscedastic Student's *t* test (assuming unequal variance) was performed in  
357 Microsoft Excel (Microsoft Corporation, Redmond, WA USA). For Fig 6, Student's *t* test was  
358 calculated manually.

### 359 **Images**

360           Graphs were plotted in Microsoft Excel. FACS images were generated in FlowJo  
361 (FlowJo LLC, Ashland, OR USA). Figures were prepared in Adobe Illustrator (Adobe Systems,  
362 San Jose, CA USA). Images were cropped, annotated and modified to optimise brightness  
363 and contrast only.

364

365

366

367

368

369

370

371

372

373

374

375

376

377

378

379

380

381

## RESULTS

382

### Establishment of Clonal Cell Lines Derived from Aag2 Cells

383

384

385

386

387

388

389

390

391

392

393

394

395

396

397

398

399

400

401

402

403

404

405

406

The *Ae. aegypti* Aag2 cell line forms a discontinuous monolayer of cells interspersed with three-dimensional cell clusters attached to the substrate and large rounded cells floating in isolation through the culture medium (Fig 1A). It is in principle possible that these morphological differences reflect underlying functional differences [53,54]. We therefore derived clonal cell lines from Aag2 cells to provide a more homogeneous and better-defined experimental background, for example for the generation of our previously reported CRISPR-edited cell lines [59,60]. Parental Aag2 cells were individually sorted into three 96-well plates using flow cytometry, with a stringent double gating scheme for single cells (Fig 1B). Of the 288 single cells plated, 90 clones expanded into multi-cell cultures in 24-well plates within three weeks. Fifteen of these clones were selected for further study and assigned reference numbers preceded by the prefix 'AF' (Aag2-AF1, Aag2-AF2 etc.). Clone Aag2-AF13 succumbed to fungal infection and is not discussed further. The set of clones was selected to be representative of the different morphologies observed across the population of clonal cell lines generated. Some clones resembled the parental Aag2 cell line (Fig 1Ci) while others did not form monolayers and instead either grew in large clusters attached to the substrate (Fig 1Cii) or grew floating individually and in aggregates in the culture medium (Fig 1Ciii). These clustered and floating morphologies are also observed in parental Aag2 cells (Fig 1A). Across all single-cell clones generated, these three morphologies ('parental Aag2-like', 'clustered', 'rounded') were represented at similar levels, with slightly more 'clustered' cell lines observed (Fig 1D). However, all of the clonal cell lines reverted back to the parental Aag2 morphology over time (Fig 1E), with this parental Aag2 morphology being stably maintained over many passages. This suggests that the different cell morphologies observed in the parental Aag2 cell line are not indicative of the presence of different cell types within the heterogeneous Aag2 cell culture.



407

408 **Fig 1. Generation of clonal Aag2-derived cell lines originating from single cells.**

409 (A) Brightfield microscopy image of heterogeneous Aag2 cell population consisting of  
410 multicellular 'clusters' (examples indicated by hashed lines throughout) and large rounded  
411 floating cells (arrows) interspersed across a loose monolayer. (B) FACS gating strategy  
412 illustrating selection of live single cells from DAPI-stained Aag2 cell suspension. (C) Resultant  
413 Aag2-derived clonal cell line morphologies following limited expansion; (i) similar appearance  
414 to parental Aag2 cells, (ii) highly clustered cells with no monolayer formation (some rounded  
415 floating cells present), (iii) only large rounded floating cells observable (individual cells and  
416 large multi-cell floating aggregates). Only those fourteen clones selected for further study are  
417 shown. Images were taken immediately following three-week expansion from single cells into  
418 confluent 24-well plate culture. # The Aag2-AF5 cell line was selected for CRISPR gene editing  
419 [59,60] (see main text). (D) Total number of clonal cell lines of each morphology generated.  
420 (E) Reversion of 'clustered' and 'rounded' clonal cell lines back to parental Aag2-like  
421 morphology following extended culture. Scale bar is 200  $\mu\text{m}$ .

422

423 We observed no gross differences in the growth kinetics of any of the Aag2-derived  
424 single-cell clones compared to the parental Aag2 cell line during routine culture. Before  
425 proceeding, we also confirmed that all clonal cell lines tested negative for mycoplasma. Note  
426 that we have used clone Aag2-AF5 as a well-defined single cell-derived starting point for the  
427 generation of Aag2 mutants using CRISPR [59,60].

428 **Parental Aag2 Cells Do Not Contain PCLV-Derived DNA Sequences Integrated**  
429 **into Their Genome**

430 In mosquitoes and their derived cell lines, fragments of RNA virus genomes, including  
431 insect-specific virus genomes, can be reverse transcribed into DNA by endogenous reverse

432 transcriptases [72,73], following which these fragments can become integrated into the cellular  
433 genome [74-77]. DNA sequences derived from members of the *Flaviviridae*, *Rhabdoviridae*  
434 and other viral families are known to be integrated within the Aag2 genome [54,75]. We were  
435 ultimately interested in studying the potential impact of persistent PCLV infection on acute  
436 superinfection with arboviruses in our Aag2-derived clonal cell lines, and therefore first  
437 investigated whether sequences derived from PCLV specifically are also integrated into the  
438 parental Aag2 cell genome. We performed a BLASTn search against the Aag2 reference  
439 genome [70] using our previously published full-length genome sequences for the PCLV  
440 known to infect the parental Aag2 cell line [57]. We did not identify any statistically significant  
441 (E-value  $<10^{-5}$ ) PCLV-derived sequences from any of the three viral genome segments (L, M,  
442 S) in the Aag2 reference genome sequence.

443 To rule out the possibility that fragments derived from persistent PCLV infection are  
444 integrated into the specific version of the parental Aag2 cell line growing in our lab, we  
445 designed primers to amplify short (50-150-nt) fragments covering each genome segment in  
446 1,000-nt intervals. As a positive control we used RNA purified from parental Aag2 cells that  
447 had been subjected to a reverse transcription reaction (Fig 2A). To control for template that  
448 was only present in RNA form, we spiked the samples with the RNA virus Newcastle disease  
449 virus (NDV). To confirm that the RNA samples were not contaminated with residual DNA, we  
450 treated RNA with RNase or DNase prior to performing RT-PCR. Here, the mosquito genomic  
451 ribosomal subunit 7 (Rps7) served as a control, as this sequence is present in both RNA and  
452 DNA forms within the cell. For each PCLV-specific primer pair, and the NDV and Rps7  
453 controls, RNase treatment eliminated the PCR signal, while DNase treatment did not (Fig 2A).  
454 This confirms the purity of the RNA samples. No PCLV signal was detected when PCR was  
455 performed on RNA that had not been subjected to reverse transcription, or on RNA isolated  
456 from the mammalian Madin-Darby canine kidney (MDCK) cell line, which should not contain  
457 genomic integrations of insect-specific virus sequences (Fig 2A). We then repeated the  
458 experiment using genomic DNA isolated from parental Aag2 cells, and detected no evidence

459 of DNA sequences derived from PCLV (Fig 2A). Importantly, Rps7 was amplified when  
460 genomic DNA was treated with RNase, but not DNase, confirming the purity of the DNA  
461 samples (Fig 2A). Although we cannot exclude the possibility that the primers we designed  
462 missed smaller fragments of integrated PCLV sequence, our data suggest that PCLV  
463 fragments are not integrated into the genome of parental Aag2 cells, which is in agreement  
464 with data from other research groups [56].

465

466 **Fig 2. Aag2-AF10 and Aag2-AF12 cell lines harbour barely detectable levels of**  
467 **Phasi Charoen-like virus.**

468 (A) Short PCR amplicons spanning the three PCLV genome segments (L, M, S)  
469 amplified from RNA or genomic DNA isolated from parental Aag2 cells, either with or without  
470 a reverse transcription step (RT). Purified nucleic acids were treated with RNase or DNase  
471 prior to PCR. MDCK cell RNA, the cellular Rps7 gene/mRNA and the RNA virus NDV, which  
472 was spiked into cells immediately prior to RNA extraction, serve as controls. (B) Detection of  
473 the PCLV S segment and CFAV by RT-PCR in Aag2-derived clonal cell lines. Cellular Rps7  
474 mRNA serves as a loading control. (C) Detection of the PCLV L, M and S genome (-ssRNA)  
475 and antigenome (+ssRNA) segments in select Aag2-derived clonal cell lines by sense-specific  
476 RT-PCR. Rps7 mRNA serves as a loading control. (D) PCLV L segment RT-qPCR  $\Delta\Delta C_t$   
477 (normalised to Rps7 mRNA) for select Aag2-derived clonal cell lines expressed relative to  
478 parental Aag2 cell line at (i) early passages (Aag2-AF10, passage 2; Aag2-AF12, passage 3)  
479 and (ii) later passages (Aag2-AF10, passage 8; Aag2-AF12, passage 12). Error bars  
480 represent standard deviation. UD, undetected. # Aag2-AF5 cell line used for CRISPR gene  
481 editing [59,60].

482

483 **Identification of Aag2-Derived Clonal Cell Lines Harboring Consistently Low**  
484 **Levels of Persistent Insect-Specific Bunyavirus Infection**

485 We next tested whether all of our Aag2-derived clonal cell lines still contained both of  
486 the insect-specific viruses known to persistently infect parental Aag2 cells. We detected CFAV  
487 RNA by RT-PCR in parental Aag2 cells and in all of our clonal cell lines, with cellular Rps7  
488 RNA serving as a template control (Fig 2B). In contrast, clones Aag2-AF10 and Aag2-AF12  
489 did not contain detectable levels of the PCLV S segment in this assay, while PCLV RNA was  
490 clearly detectable to varying degrees in parental Aag2 cells and in the other clones (Fig 2B).  
491 To verify this result, we performed strand-specific RT-PCR to amplify genome and antigenome  
492 sequences from each of the three PCLV genome segments, with Rps7 serving as a template  
493 control. In this experiment we did detect PCLV M segment RNA in the Aag2-AF10 clone at  
494 lower levels than the parental Aag2 cell line (Fig 2C). Although any amplification of the L and  
495 S segments were below the limit of detection, the presence of both genome and antigenome  
496 sequences for the M segment indicates that the virus must be replicating its RNA and therefore  
497 the L (RdRp) and S (nucleocapsid) segments, which are both required for genome replication,  
498 must also be present. No PCLV RNA was detected in the Aag2-AF12 clone in this assay.

499 Finally, we measured PCLV L segment RNA by RT-qPCR and detected low levels of  
500 PCLV RNA in the Aag2-AF10 clone, with PCLV RNA consistently maintained at lower levels  
501 relative to the parental Aag2 cell line over multiple cell passages (Fig 2D). We did not detect  
502 PCLV RNA at early passages in the Aag2-AF12 clone, though very low levels of PCLV were  
503 detected at later passages (Fig 2D). Overall, our data indicate that clones Aag2-AF10 and  
504 Aag2-AF12 harbour markedly reduced levels of PCLV infection that are maintained at  
505 consistently low levels over multiple cell passages.

### 506 **All Aag2-Derived Clonal Cell Lines Have a Functional RNAi Pathway**

507 Derived cell lines can have markedly different characteristics compared to their  
508 parental cell lines, and several mosquito cell lines in particular are known to be  
509 immunodeficient compared to the cell lines they were derived from [43,53,54]. Before  
510 proceeding, we therefore tested our Aag2-derived clonal cell lines for RNAi functionality, since

511 this immune pathway is defective in several mosquito cell lines, such as C6/36 and C7/10  
512 [43,53,54]. In parental Aag2 cells, transient co-transfection of a constitutively active firefly  
513 luciferase reporter plasmid with a dsRNA directed against firefly luciferase significantly  
514 reduced luciferase expression compared to a non-specific dsRNA directed against GFP,  
515 confirming that RNAi is active in the parental Aag2 cell line (Fig 3). In contrast, the luciferase  
516 dsRNA did not significantly reduce reporter activity in RNAi-defective C6/36 cells (Fig 3). The  
517 luciferase-specific dsRNA significantly reduced firefly luciferase activity in all of the Aag2-  
518 derived clonal cell lines, confirming that all of the clones have a functional RNAi pathway (Fig  
519 3). Furthermore, the clonal cell line Aag2-AF5 was previously shown to have a functional RNAi  
520 pathway as measured by the production of 21-nt siRNAs during viral infection [59,60].

521

522 **Fig 3. All Aag2-derived clonal cell lines have a functional RNAi pathway.**

523 C6/36 cells, the parental Aag2 cell line and its derived clonal cell lines were transiently  
524 transfected with plasmids constitutively expressing firefly luciferase and *Renilla* luciferase  
525 (transfection control) in the presence of dsRNA directed against GFP (dsGFP) or firefly  
526 luciferase (dsLuc). Mean *Renilla*-normalised firefly luciferase (FFluc) expression is expressed  
527 relative to the dsGFP negative control. \*  $P < 0.05$ ; \*\*  $P < 0.01$ ; \*\*\*  $P < 0.001$ ; ns, not significant  
528 (one-tailed Student's *t* test). Error bars represent standard deviation. # Aag2-AF5 cell line used  
529 for CRISPR gene editing [59,60] is highlighted in orange. PCLV-low clones Aag2-AF10 and  
530 Aag2-AF12 are highlighted in green; parental Aag2 cells and C6/36 cells (negative control)  
531 are shown in purple.

532

533 **Pre-Existing Persistent Infection With PCLV Does Not Modulate Acute**  
534 **Superinfection With Flaviviruses**

535           The isolation of the clonal cell lines Aag2-AF10 and Aag2-AF12 provided an  
536 opportunity to test whether a pre-existing persistent infection with an insect-specific virus (in  
537 this case PCLV) modulates the replication of arboviruses in cell culture by comparing these  
538 PCLV-low clones to clones harbouring higher levels of PCLV. We started by testing the  
539 flavivirus DENV serotype 2 (DENV-2), which replicated with a peak in titres six days post-  
540 infection in a one-step growth curve at high multiplicity of infection (MOI 2) in the parental  
541 Aag2 cell line (Fig 4A). DENV-2 replicated with similar kinetics (1, 2, 3 days post-infection)  
542 and to a similar level three days post-infection in clones Aag2-AF10 and Aag2-AF12 relative  
543 to the parental Aag2 cell line at MOI 2 (Fig 4B). This indicates that the markedly suppressed  
544 PCLV infection in clones Aag2-AF10 and Aag2-AF12 had very little impact on DENV-2  
545 replication. Although DENV-2 exhibited somewhat different growth kinetics across the Aag2-  
546 derived clonal cell lines, titres three days post-infection did not deviate from the parental Aag2  
547 cell line by more than one log, and were close to within half a log of the parental Aag2 cell line  
548 for all clones (Fig 4B).

549

550           **Fig 4. Susceptibility of Aag2-derived clonal cell lines to infection with**  
551 **arboviruses.**

552           (A, C, E, G) Single-step growth kinetics of DENV-2 (A), ZIKV (C), SINV (E) and VSV  
553 (G) in the parental Aag2 cell line (MOI 2). Grey shading highlights time points tested in Aag2-  
554 derived clonal cell lines. (B, D, F, H) Replication of DENV-2 (B) and ZIKV (D) at 1, 2 and 3  
555 days post-infection, replication of SINV (F) at 6, 12 and 24 hours post-infection (hpi), and  
556 replication of VSV (H) at 6, 9 and 12 hpi in the parental Aag2 cell line and its derived clonal  
557 cell lines (all MOI 2). Grey shading indicates 0.5 Log<sub>10</sub> above and 0.5 Log<sub>10</sub> below peak  
558 extracellular titres detected in parental Aag2 cell line. Error bars represent standard deviation.  
559 Parental Aag2 cell line highlighted in purple; Aag2-AF5 cell line used for CRISPR gene editing

560 [59,60] highlighted in orange; Aag2-AF10 and Aag2-AF12 cell lines with low PCLV levels  
561 highlighted in green.

562

563 We next tested the flavivirus ZIKV, which replicated with a peak in titres three days  
564 post-infection in the parental Aag2 cell line at MOI 2 (Fig 4C). While ZIKV replicated with faster  
565 kinetics (1, 2, 3 days post-infection) and to a more than one-log higher titre at its peak in clone  
566 Aag2-AF12, the growth kinetics and peak titres were similar to the parental Aag2 cell line in  
567 clone Aag2-AF10 (Fig 4D). Therefore, although clone Aag2-AF12 appears to be more  
568 permissive to ZIKV replication, this is not linked to PCLV levels, which are also reduced in  
569 clone Aag2-AF10. Again, ZIKV replication kinetics varied somewhat across the other clones,  
570 but fell close to within half a log from the parental Aag2 cell line at their peak.

571 Replication kinetics of both DENV-2 and ZIKV in clone Aag2-AF5 were comparable to  
572 the parental Aag2 cell line (Fig 4B and 4D).

### 573 **Pre-Existing Persistent Infection With PCLV Does Not Modulate Acute** 574 **Superinfection With the Alphavirus Sindbis Virus**

575 Alphaviruses, like flaviviruses, are +ssRNA viruses, and we next tested replication of  
576 the model alphavirus SINV in our Aag2-derived clonal cell lines. SINV replication peaked 48  
577 hpi in parental Aag2 cells infected at MOI 2 (Fig 4E). SINV replication kinetics (6, 12, 24 hpi)  
578 and peak viral titres were similar in clones Aag2-AF10 and Aag2-AF12 compared to parental  
579 Aag2 cells (Fig 4F), indicating that persistent PCLV infection does not markedly alter SINV  
580 replication. Again, variability in the replication kinetics and peak titres of SINV were observed  
581 across the other Aag2-derived clonal cell lines. SINV replication kinetics and peak titres in  
582 clone Aag2-AF5 were comparable to the parental Aag2 cell line.

### 583 **Pre-Existing Persistent Infection With PCLV Does Not Modulate Acute** 584 **Superinfection With the Rhabdovirus Vesicular Stomatitis Virus**

585 As a contrast to the +ssRNA arboviruses tested, we next tested the -ssRNA  
586 rhabdovirus VSV. In a one-step growth curve (MOI 2), VSV replication peaked 12 hpi in  
587 parental Aag2 cells (Fig 4G). As for the other viruses tested, peak titres of VSV in clones Aag2-  
588 AF10 and Aag2-AF12 were within one log compared to the parental Aag2 cell line at 12 hpi,  
589 with some variability in replication kinetics (6, 9, 12 hpi) observed across all Aag2-derived  
590 single-cell clones (Fig 4H). VSV replicated similarly in clone Aag2-AF5 and the parental Aag2  
591 cell line.

592 Overall, we therefore conclude that pre-existing persistent infection with PCLV does  
593 not notably alter the replication of a diverse range of +ssRNA and -ssRNA arboviruses, since  
594 replication kinetics and peak titres of DENV-2, ZIKV, SINV and VSV were not markedly  
595 different from the parental Aag2 cell line in clones Aag2-AF10 and Aag2-AF12, which harbour  
596 drastically reduced levels of persistent PCLV infection.

#### 597 **Transfection Efficiency of Clone Aag2-AF5**

598 Next, we further characterised clone Aag2-AF5 with the goal of providing a better-  
599 defined Aag2-derived cell line for the research community. Clone Aag2-AF5 was selected  
600 because, of all the isolated clones, arboviral infectivity in Aag2-AF5 cells was most similar to  
601 the parental Aag2 cells (Fig 4). Furthermore, this clone formed a more uniform monolayer and  
602 was more resilient and easier to handle in culture than parental Aag2 cells.

603 First, we tested the transfection efficiency of this clone by transient transfection with a  
604 constitutive GFP expression plasmid (Fig 5A). A similar proportion of Aag2-AF5 cells (56%)  
605 were detectably GFP-positive compared to the parental Aag2 cell line (47%) (Fig 5B);  
606 differences were not statistically significant. However, the GFP signal was brighter in Aag2-  
607 AF5 cells (Fig 5A). This higher level of transgene expression in Aag2-AF5 cells was confirmed  
608 by transient transfection with a constitutively active firefly luciferase reporter plasmid (Fig 5C).  
609 Therefore, while the overall proportion of cells transiently expressing a transgene is  
610 comparable for clone Aag2-AF5 and the parental Aag2 cell line, individual Aag2-AF5 cells



611 express transgenes to higher levels, making this clone well-suited for molecular experiments  
612 including gene editing using CRISPR [59,60].

613

614 **Fig 5. Transfection efficiency of clone Aag2-AF5 relative to parental Aag2 cells.**

615 (A) Cells were imaged at 10X magnification 48 h after transient transfection with a  
616 constitutively active GFP expression vector (pIEx-EGFP). (B) Quantification of transfection  
617 efficiency; differences are non-significant. (C) Cells were transiently transfected with a  
618 constitutively active firefly luciferase reporter plasmid (pIEx-luc) and luciferase activity was  
619 measured four days later. \*  $P < 0.05$  (two-tailed Student's  $t$  test). RLU, relative light units. All  
620 error bars represent standard deviation. # Aag2-AF5 cell line used for CRISPR gene editing  
621 [59,60].

622

623 **Antimicrobial Peptide Induction in Clone Aag2-AF5**

624 Clone Aag2-AF5 was already confirmed to have an active antiviral RNAi pathway (Fig  
625 3) [59,60], and we next tested whether this clone was also competent for antimicrobial peptide  
626 induction *via* inducible innate immune signalling pathways. When stimulated with heat-  
627 inactivated Gram-negative (*Escherichia coli*) or Gram-positive (*Listeria monocytogenes* or  
628 *Staphylococcus aureus*) bacteria, which are well-defined stimuli of inducible innate immune  
629 signalling pathways [51], upregulation of the antimicrobial peptides defensin D (DefD),  
630 cecropin B (CecB) and cecropin D (CecD) was detected in both parental Aag2 cells and clone  
631 Aag2-AF5 with all stimuli (Fig 6). There was however some variability in the relative levels of  
632 antimicrobial peptide induction in clone Aag2-AF5 compared to the parental cell line for  
633 different gene/stimulus combinations. Thus, all tested antimicrobial peptide genes were less  
634 inducible in clone Aag2-AF5 with *E. coli* stimulation (Fig 6A), and CecD was also less inducible  
635 in clone Aag2-AF5 for all stimuli tested (Fig 6Aiii, 6Biii and 6Ciii), though some of these

636 differences were not significant. In contrast, DefD and CecB were more inducible in clone  
637 Aag2-AF5 during stimulation with Gram-positive bacteria compared to the parental Aag2 cell  
638 line (Fig 6Bi, 6Bii, 6Ci and 6Cii), with some of these differences again being non-significant.  
639 Therefore, while there may be subtle differences in the immune sensitivity of clone Aag2-AF5  
640 in terms of antimicrobial peptide production compared to parental Aag2 cells, there is no gross  
641 defect in inducible innate immune pathways in response to bacterial stimulation.

642

643 **Fig 6. Antimicrobial peptide induction in clone Aag2-AF5 compared to parental**  
644 **Aag2 cells.**

645 Cells were stimulated with heat-inactivated *E. coli* (A), *L. monocytogenes* (B) or *S.*  
646 *aureus* (C) for 24 h and induction of DefD (i), CecB (ii) or CecD (iii) was measured by RT-  
647 qPCR. Gene induction is relative to the respective unstimulated cell line. \*  $P < 0.05$ ; \*\*  $P <$   
648  $0.01$ ; ns, not significant (two-tailed Student's *t* test). Error bars represent standard error of the  
649 mean. # Aag2-AF5 cell line used for CRISPR gene editing [59,60].

650

651

652

653

654

655

656

657

658

659

## DISCUSSION

660 In this study, we generated clonal cell lines from the widely used Aag2 cell line. While  
661 the different morphologies within the parental Aag2 cell line could have been indicative of the  
662 presence of different embryo-derived cell types, this appears not to be the case as all of the  
663 clonal cell lines reverted back to the parental Aag2 cell morphology, with cell clusters and  
664 floating cells above the monolayer. In our hands, the Aag2 morphology is highly susceptible  
665 to culture conditions, and therefore the different cell morphologies may instead reflect cellular  
666 responses to growth phase, cell density or nutrient status.

667 Across all of the clonal Aag2-derived cell lines, there was minor variability in the  
668 replication kinetics and peak titres for all of the viruses tested. These effects were not  
669 consistent across viruses or cell lines and did not overall correlate consistently with the  
670 presence or level of insect-specific viruses in the culture. Neither are these effects likely to be  
671 linked to variability in immune responses because all clonal cell lines had a functional RNAi  
672 pathway, considered to be the major antiviral immune pathway in insects [49,50]. However,  
673 we did not extensively test inducible immune pathways such as Toll, IMD or Jak-STAT  
674 signalling in all clones. The clonal cell lines may exhibit variability in the expression of pro- or  
675 anti-viral factors, and could therefore be useful for identifying viral restriction factors or host  
676 proteins required for viral replication in mosquito cells.

### 677 **Clone Aag2-AF5 as a Defined Cell Line for the Arbovirus Research Community**

678 There has been a drive to improve data reproducibility, with the standardisation of  
679 experimental methods and tools representing one important means of achieving this end [78].  
680 We believe that our Aag2-derived clone Aag2-AF5 represents a useful standardised *Ae.*  
681 *aegypti* cell line for the arbovirus research community, and have made the cell line available  
682 via ECACC ([phe-culturecollections.org.uk](http://phe-culturecollections.org.uk)). The parental Aag2 cell line has previously been  
683 shown to be a valuable tool for studying mosquito immune responses to arbovirus infection  
684 [49,50], and we confirmed that Aag2-AF5 cells are also competent for RNAi and antimicrobial

685 peptide induction. Furthermore, the viruses tested all replicated with similar kinetics and to  
686 similar peak titres in Aag2-AF5 cells compared to the parental Aag2 cell line, and this clone  
687 was therefore chosen to allow comparison to experiments performed in parental Aag2 cells.  
688 Morphologically, Aag2-AF5 cells are similar to the parental Aag2 cell line, and easier to work  
689 with in culture. Both CFAV and PCLV remain present in Aag2-AF5 cells, though PCLV is  
690 present at slightly reduced levels compared to the parental Aag2 cell line (Fig 2B). Aag2-AF5  
691 cells are readily transfected and express exogenous proteins to high levels. We have also  
692 previously shown that Aag2-AF5 cells are easily gene edited using CRISPR [59], and Aag2-  
693 AF5 cells provide a more homogeneous background for gene editing experiments compared  
694 to the parental Aag2 cell line.

695 We have shared Aag2-AF5 cells widely within the research community, and their  
696 availability via ECACC should further increase their utility in standardising cell culture  
697 experiments to provide more reproducible data on arbovirus-vector interactions in *Ae. aegypti*  
698 cells.

### 699 **Impact of Persistent Insect-Specific Virus Infection on Arbovirus Replication**

700 Two of the clonal Aag2-derived cell lines (Aag2-AF10 and Aag2-AF12) exhibited  
701 markedly reduced levels of persistent PCLV infection. PCLV levels remained consistently low  
702 over multiple passages, and in the case of Aag2-AF12 cells were so low as to be only  
703 intermittently detectable. In the wild, insect-specific viruses primarily cause persistent infection  
704 of mosquitoes, and comparison of the PCLV-low clones Aag2-AF10 and Aag2-AF12 to  
705 parental Aag2 cells allowed us to more accurately model these natural conditions than  
706 previous studies that tested the impact of acute insect-specific virus infection on arbovirus  
707 replication [31,34-37,41,42].

708 We observed no consistent impact of PCLV on the replication of representative  
709 flaviviruses (DENV-2, ZIKV), alphaviruses (SINV) or rhabdoviruses (VSV), representing both  
710 +ssRNA and -ssRNA arboviruses. To our knowledge, only one previous study tested the

711 impact of persistent insect-specific virus (AeAV) infection on arbovirus (DENV) replication in  
712 immunocompetent *Aedes spp.* cell cultures [19], with at most a minor reduction in DENV  
713 replication in the presence of AeAV. Our data agree with this study in that no major impact of  
714 persistent insect-specific virus infection was observed on arbovirus replication, with our study  
715 extending this observation to a broader set of arboviral families. A study by Kuwata *et al.* also  
716 found that persistent insect-specific virus (CxFV) infection did not reduce, and in fact  
717 increased, arbovirus (DENV, JEV) replication in a *Culex tritaeniorhynchus* cell line [29]. To our  
718 knowledge there are no studies testing the impact of persistent insect-specific virus infection  
719 on arbovirus replication *in vivo* in *Aedes spp.*, however our cell line data are also in agreement  
720 with an *in vivo* study in *Culex spp.* that found no impact of persistent insect-specific virus  
721 (CxFV) infection on arbovirus (West Nile virus, WNV) transmission [32].

722         The lack of impact of persistent insect-specific virus infection on arbovirus replication  
723 in *Aedes spp.* cell culture is noteworthy because a number of studies have reported reduced  
724 replication of arboviruses in the presence of acute insect-specific virus infection in cell lines  
725 [31,34-37] and in the presence of acute insect-specific virus infection *in vivo* [31,35-37] in both  
726 *Aedes spp.* and *Culex spp.* Arboviruses have been shown to be affected differently when  
727 entering cells harbouring acute *versus* persistent insect-specific virus infection [40], which  
728 likely expose arboviruses to markedly different cellular environments. For instance, immune  
729 responses likely differ under acute *versus* persistent infection scenarios, and persistent  
730 infection with at least one insect-specific virus (Culex Y virus) has been shown to modulate  
731 RNAi responses [79]. Therefore, studies linking acute or persistent insect-specific virus  
732 infection to reduced arbovirus replication in the immunocompromised C6/36 cell line  
733 [32,33,39,40] may also not fully reflect the effects of persistent insect-specific virus infection  
734 in natural settings.

735         Our findings and those of others [19,32] suggest that the persistent insect-specific virus  
736 infections encountered by arboviruses in nature and in mosquitoes hypothetically infected for  
737 environmental release may not reduce, and may in fact enhance [29], arbovirus transmission.

738 However, further studies are required to reconcile the contradictory observations made by  
739 different research groups, which may be influenced by insect-specific virus infection status  
740 (acute *versus* persistent), as well as the tripartite combination of arbovirus, insect-specific  
741 virus and mosquito species. Representative *in vivo* studies in particular are much needed,  
742 since cell culture experiments do not fully recapitulate all facets of the arbovirus infection  
743 process in mosquitoes.

744 We therefore provide new insights that may have important implications for the use of  
745 insect-specific viruses as biocontrol agents to reduce the transmission of arboviruses.  
746 Furthermore, clone Aag2-AF5 represents a valuable new clonal and better-defined cell line to  
747 provide a more standardised system for studying arbovirus-vector interactions in cell culture.

748

749

750

751

752

753

754

755

756

757

758

759

760

## ACKNOWLEDGEMENTS

761           None.

762

763

## AUTHORS' CONTRIBUTIONS

764           KM and ADD conceived the project. KM, AF-S and ADD secured funding. ACF, LEW,  
765 TAR and KM performed experiments. All authors were involved in the analysis and  
766 interpretation of data. KM wrote the manuscript. All authors contributed to the preparation of  
767 the manuscript. All authors read and approved the final manuscript.

768

769

770

771

772

773

774

775

776

777

778

779

780

781

## REFERENCES

- 782 1. Weaver SC, Charlier C, Vasilakis N, Lecuit M. Zika, Chikungunya, and Other Emerging  
783 Vector-Borne Viral Diseases. *Annu Rev Med.* 2017;69: 395–408. doi:10.1146/annurev-  
784 med-050715-105122
- 785 2. Bolling BG, Weaver SC, Tesh RB, Vasilakis N. Insect-Specific Virus Discovery:  
786 Significance for the Arbovirus Community. *Viruses.* Multidisciplinary Digital Publishing  
787 Institute; 2015;7: 4911–4928. doi:10.3390/v7092851
- 788 3. Cook S, Moureau G, Kitchen A, Gould EA, de Lamballerie X, Holmes EC, et al.  
789 Molecular evolution of the insect-specific flaviviruses. *J Gen Virol.* 2012;93: 223–234.  
790 doi:10.1099/vir.0.036525-0
- 791 4. Kuno G, Chang G-JJ. Biological transmission of arboviruses: reexamination of and new  
792 insights into components, mechanisms, and unique traits as well as their evolutionary  
793 trends. *Clinical Microbiology Reviews.* American Society for Microbiology Journals;  
794 2005;18: 608–637. doi:10.1128/CMR.18.4.608-637.2005
- 795 5. Weaver SC, Barrett ADT. Transmission cycles, host range, evolution and emergence  
796 of arboviral disease. *Nat Rev Micro.* 2004;2: 789–801. doi:10.1038/nrmicro1006
- 797 6. Kramer LD. Complexity of virus-vector interactions. *Current Opinion in Virology.*  
798 2016;21: 81–86. doi:10.1016/j.coviro.2016.08.008
- 799 7. Souza-Neto JA, Powell JR, Bonizzoni M. *Aedes aegypti* vector competence studies: A  
800 review. *Infect Genet Evol.* 2018;67: 191–209. doi:10.1016/j.meegid.2018.11.009
- 801 8. Beerntsen BT, James AA, Christensen BM. Genetics of Mosquito Vector Competence.  
802 *Microbiology and Molecular Biology Reviews.* American Society for Microbiology;  
803 2000;64: 115–137. doi:10.1128/MMBR.64.1.115-137.2000



- 804 9. Kramer MC, Liang D, Tatomer DC, Gold B, March ZM, Cherry S, et al. Combinatorial  
805 control of *Drosophila* circular RNA expression by intronic repeats, hnRNPs, and SR  
806 proteins. *Genes Dev.* Cold Spring Harbor Lab; 2015;29: 2168–2182.  
807 doi:10.1101/gad.270421.115
- 808 10. Walker T, Johnson PH, Moreira LA, Iturbe-Ormaetxe I, Frentiu FD, McMeniman CJ, et  
809 al. The wMel *Wolbachia* strain blocks dengue and invades caged *Aedes aegypti*  
810 populations. *Nature.* Nature Publishing Group; 2011;476: 450–453.  
811 doi:10.1038/nature10355
- 812 11. Moreira LA, Iturbe-Ormaetxe I, Jeffery JA, Lu G, Pyke AT, Hedges LM, et al. A  
813 *Wolbachia* Symbiont in *Aedes aegypti* Limits Infection with Dengue, Chikungunya, and  
814 *Plasmodium*. *Cell.* Elsevier Ltd; 2009;139: 1268–1278. doi:10.1016/j.cell.2009.11.042
- 815 12. Blagrove MSC, Arias-Goeta C, Failloux AB, Sinkins SP. *Wolbachia* strain wMel induces  
816 cytoplasmic incompatibility and blocks dengue transmission in *Aedes albopictus*. *Proc*  
817 *Natl Acad Sci.* 2012;109: 255–260. doi:10.1073/pnas.1112021108
- 818 13. Bian G, Xu Y, Lu P, Xie Y, Xi Z. The Endosymbiotic Bacterium *Wolbachia* Induces  
819 Resistance to Dengue Virus in *Aedes aegypti*. Schneider DS, editor. *PLoS Pathog.*  
820 2010;6: e1000833. doi:10.1371/journal.ppat.1000833.s001
- 821 14. Ferguson NM. Challenges and opportunities in controlling mosquito-borne infections.  
822 *Nature.* Nature Publishing Group; 2018;559: 490–497. doi:10.1038/s41586-018-0318-  
823 5
- 824 15. Öhlund P, Lundén H, Blomström A-L. Insect-specific virus evolution and potential  
825 effects on vector competence. *Virus Genes.* Springer US; 2019;64: 1–11.  
826 doi:10.1007/s11262-018-01629-9

- 827 16. Zakrzewski M, Rasic G, Darbro J, Krause L, Poo YS, Filipovic I, et al. Mapping the  
828 virome in wild-caught *Aedes aegypti* from Cairns and Bangkok. *Sci Rep. Nature*  
829 *Publishing Group*; 2018;8: 4690. doi:10.1038/s41598-018-22945-y
- 830 17. Zhang X, Huang S, Jin T, Lin P, Huang Y, Wu C, et al. Discovery and high prevalence  
831 of Phasi Charoen-like virus in field-captured *Aedes aegypti* in South China. *Virology*.  
832 2018;523: 35–40. doi:10.1016/j.virol.2018.07.021
- 833 18. Yamao T, Eshita Y, Kihara Y, Satho T, Kuroda M, Sekizuka T, et al. Novel virus  
834 discovery in field-collected mosquito larvae using an improved system for rapid  
835 determination of viral RNA sequences (RDV ver4.0). *Archives of Virology*. 2009;154:  
836 153–158. doi:10.1007/s00705-008-0285-5
- 837 19. Parry R, Asgari S. *Aedes anphevirus* (AeAV): an insect-specific virus distributed  
838 worldwide in *Aedes aegypti* mosquitoes that has complex interplays with *Wolbachia*  
839 and dengue virus infection in cells. *J Virol. American Society for Microbiology*; 2018;:  
840 JVI.00224–18. doi:10.1128/JVI.00224-18
- 841 20. Vasilakis N, Guzman H, Firth C, Forrester NL, Widen SG, Wood TG, et al.  
842 *Mesoniviruses* are mosquito-specific viruses with extensive geographic distribution and  
843 host range. *Viol J*. 2014;11: 97. doi:10.1186/1743-422X-11-97
- 844 21. Huhtamo E, Putkuri N, Kurkela S, Manni T, Vaheri A, Vapalahti O, et al.  
845 Characterization of a novel flavivirus from mosquitoes in northern Europe that is related  
846 to mosquito-borne flaviviruses of the tropics. *J Virol*. 2009;83: 9532–9540.  
847 doi:10.1128/JVI.00529-09
- 848 22. Sangdee K, Pattanakitsakul S-N. Comparison of Mosquito *Densoviruses*: Two Clades  
849 of Viruses Isolated from Indigenous Mosquitoes. *Southeast Asian Journal of Tropical*  
850 *Medicine and Public Health*. 2013;44: 586–593.

- 851 23. Junglen S, Kopp A, Kurth A, Pauli G, Ellerbrok H, Leendertz FH. A new flavivirus and  
852 a new vector: characterization of a novel flavivirus isolated from uranotaenia  
853 mosquitoes from a tropical rain forest. *J Virol.* 2009;83: 4462–4468.  
854 doi:10.1128/JVI.00014-09
- 855 24. Nasar F, Palacios G, Gorchakov RV, Guzman H, Da Rosa APT, Savji N, et al. Eilat  
856 virus, a unique alphavirus with host range restricted to insects by RNA replication. *Proc*  
857 *Natl Acad Sci.* 2012;109: 14622–14627. doi:10.1073/pnas.1204787109
- 858 25. Cook S, Bennett SN, Holmes EC, De Chesse R, Moureau G, de Lamballerie X. Isolation  
859 of a new strain of the flavivirus cell fusing agent virus in a natural mosquito population  
860 from Puerto Rico. *J Gen Virol.* 2006;87: 735–748. doi:10.1099/vir.0.81475-0
- 861 26. Cook S, Moureau G, Harbach RE, Mukwaya L, Goodger K, Ssenfuka F, et al. Isolation  
862 of a novel species of flavivirus and a new strain of *Culex flavivirus* (Flaviviridae) from a  
863 natural mosquito population in Uganda. *J Gen Virol.* 2009;90: 2669–2678.  
864 doi:10.1099/vir.0.014183-0
- 865 27. Newman CM, Cerutti F, Anderson TK, Hamer GL, Walker ED, Kitron UD, et al. *Culex*  
866 *Flavivirus* and West Nile Virus Mosquito Coinfection and Positive Ecological  
867 Association in Chicago, United States. *Vector-Borne Zoonotic Dis.* 2011;11: 1099–  
868 1105. doi:10.1089/vbz.2010.0144
- 869 28. Calzolari M, Ze-Ze L, Ruzek D, Vazquez A, Jeffries C, Defilippo F, et al. Detection of  
870 mosquito-only flaviviruses in Europe. *J Gen Virol.* 2012;93: 1215–1225.  
871 doi:10.1099/vir.0.040485-0
- 872 29. Kuwata R, Isawa H, Hoshino K, Sasaki T, Kobayashi M, Maeda K, et al. Analysis of  
873 Mosquito-Borne Flavivirus Superinfection in *Culex tritaeniorhynchus* (Diptera:  
874 Culicidae) Cells Persistently Infected with *Culex Flavivirus* (Flaviviridae). *Journal of*  
875 *Medical Entomology.* 2015;52: 222–229. doi:10.1093/jme/tju059

- 876 30. Zhang G, Asad S, Khromykh AA, Asgari S. Cell fusing agent virus and dengue virus  
877 mutually interact in *Aedes aegypti* cell lines. *Sci Rep*. Nature Publishing Group; 2017;7:  
878 6935. doi:10.1038/s41598-017-07279-5
- 879 31. Romo H, Kenney JL, Blitvich BJ, Brault AC. Restriction of Zika virus infection and  
880 transmission in *Aedes aegypti* mediated by an insect-specific flavivirus. *Emerg*  
881 *Microbes Infect*. Nature Publishing Group; 2018;7: 181. doi:10.1038/s41426-018-0180-  
882 4
- 883 32. Bolling BG, Olea-Poppelka FJ, Eisen L, Moore CG, Blair CD. Transmission dynamics of  
884 an insect-specific flavivirus in a naturally infected *Culex pipiens* laboratory colony and  
885 effects of co-infection on vector competence for West Nile virus. *Virology*. Elsevier Inc;  
886 2012;427: 90–97. doi:10.1016/j.virol.2012.02.016
- 887 33. Hobson-Peters J, Yam AWY, Lu JWF, Setoh YX, May FJ, Kurucz N, et al. A New Insect-  
888 Specific Flavivirus from Northern Australia Suppresses Replication of West Nile Virus  
889 and Murray Valley Encephalitis Virus in Co-infected Mosquito Cells. Wang T, editor.  
890 *PLoS One*. 2013;8: e56534. doi:10.1371/journal.pone.0056534.s001
- 891 34. Kenney JL, Solberg OD, Langevin SA, Brault AC. Characterization of a novel insect-  
892 specific flavivirus from Brazil: potential for inhibition of infection of arthropod cells with  
893 medically important flaviviruses. *J Gen Virol*. 2014;95: 2796–2808.  
894 doi:10.1099/vir.0.068031-0
- 895 35. Goenaga S, Kenney JL, Duggal NK, Delorey M, Ebel GD, Zhang B, et al. Potential for  
896 Co-Infection of a Mosquito-Specific Flavivirus, Nhimirim Virus, to Block West Nile Virus  
897 Transmission in Mosquitoes. *Viruses*. Multidisciplinary Digital Publishing Institute;  
898 2015;7: 5801–5812. doi:10.3390/v7112911

- 899 36. Nasar F, Erasmus JH, Haddow AD, Tesh RB, Weaver SC. Eilat virus induces both  
900 homologous and heterologous interference. *Virology*. Academic Press; 2015;484: 51–  
901 58. doi:10.1016/j.virol.2015.05.009
- 902 37. Hall-Mendelin S, McLean BJ, Bielefeldt-Ohmann H, Hobson-Peters J, Hall RA, van den  
903 Hurk AF. The insect-specific Palm Creek virus modulates West Nile virus infection in  
904 and transmission by Australian mosquitoes. *Parasit Vectors*. BioMed Central; 2016;9:  
905 414. doi:10.1186/s13071-016-1683-2
- 906 38. Schultz MJ, Frydman HM, Connor JH. Dual Insect specific virus infection limits  
907 Arbovirus replication in *Aedes* mosquito cells. *Virology*. 2018;518: 406–413.  
908 doi:10.1016/j.virol.2018.03.022
- 909 39. Fujita R, Kato F, Kobayashi D, Murota K, Takasaki T, Tajima S, et al. Persistent viruses  
910 in mosquito cultured cell line suppress multiplication of flaviviruses. *Heliyon*. 2018;4:  
911 e00736. doi:10.1016/j.heliyon.2018.e00736
- 912 40. Burivong P, Pattanakitsakul S-N, Thongrungrat S, Malasit P, Flegel TW. Markedly  
913 reduced severity of Dengue virus infection in mosquito cell cultures persistently infected  
914 with *Aedes albopictus* densovirus (AalDENV). *Virology*. 2004;329: 261–269.  
915 doi:10.1016/j.virol.2004.08.032
- 916 41. Kent RJ, Crabtree MB, Miller BR. Transmission of West Nile Virus by *Culex*  
917 *quinquefasciatus* Say Infected with *Culex* Flavivirus Izabal. Tesh RB, editor. *PLoS Negl*  
918 *Trop Dis*. 2010;4: e671. doi:10.1371/journal.pntd.0000671.t003
- 919 42. Talavera S, Birnberg L, Nuñez AI, Muñoz-Muñoz F, Vázquez A, Busquets N. *Culex*  
920 flavivirus infection in a *Culex pipiens* mosquito colony and its effects on vector  
921 competence for Rift Valley fever phlebovirus. *Parasit Vectors*. 4 ed. BioMed Central;  
922 2018;11: 405. doi:10.1186/s13071-018-2887-4

- 923 43. Brackney DE, Scott JC, Sagawa F, Woodward JE, Miller NA, Schilkey FD, et al. C6/36  
924 *Aedes albopictus* Cells Have a Dysfunctional Antiviral RNA Interference Response.  
925 O'Neill SL, editor. *PLoS Negl Trop Dis*. 2010;4: e856.  
926 doi:10.1371/journal.pntd.0000856.t001
- 927 44. Lambrechts L, Quillery E, Noel V, Richardson JH, Jarman RG, Scott TW, et al.  
928 Specificity of resistance to dengue virus isolates is associated with genotypes of the  
929 mosquito antiviral gene Dicer-2. *Proc R Soc B*. 2012;280: 20122437–20122437.  
930 doi:10.1101/gad.1482006
- 931 45. Xi Z, Ramirez JL, Dimopoulos G. The *Aedes aegypti* toll pathway controls dengue virus  
932 infection. Schneider DS, editor. *PLoS Pathog*. 2008;4: e1000098.  
933 doi:10.1371/journal.ppat.1000098
- 934 46. Souza-Neto JA, Sim S, Dimopoulos G. An evolutionary conserved function of the JAK-  
935 STAT pathway in anti-dengue defense. *Proc Natl Acad Sci USA*. National Academy of  
936 Sciences; 2009;106: 17841–17846. doi:10.1073/pnas.0905006106
- 937 47. Sim S, Jupatanakul N, Ramirez JL, Kang S, Romero-Vivas CM, Mohammed H, et al.  
938 Transcriptomic Profiling of Diverse *Aedes aegypti* Strains Reveals Increased Basal-  
939 level Immune Activation in Dengue Virus-refractory Populations and Identifies Novel  
940 Virus-vector Molecular Interactions. Ribeiro JMC, editor. *PLoS Negl Trop Dis*. 2013;7:  
941 e2295. doi:10.1371/journal.pntd.0002295
- 942 48. Jupatanakul N, Sim S, Angleró-Rodríguez YI, Souza-Neto J, Das S, Poti KE, et al.  
943 Engineered *Aedes aegypti* JAK/STAT Pathway-Mediated Immunity to Dengue Virus.  
944 Olson KE, editor. *PLoS Negl Trop Dis*. Public Library of Science; 2017;11: e0005187.  
945 doi:10.1371/journal.pntd.0005187

- 946 49. Barletta A, Silva MCLN, Sorgine M. Validation of *Aedes aegypti* Aag-2 cells as a model  
947 for insect immune studies. *Parasit Vectors*. 2012;5: 148. doi:10.1146/annurev-biochem-  
948 060208-104626
- 949 50. Zhang R, Zhu Y, Pang X, Xiao X, Zhang R, Cheng G. Regulation of Antimicrobial  
950 Peptides in *Aedes aegypti* Aag2 Cells. *Front Cell Infect Microbiol*. *Frontiers*; 2017;7: 22.  
951 doi:10.3389/fcimb.2017.00022
- 952 51. Merklung SH, van Rij RP. Beyond RNAi: Antiviral defense strategies in *Drosophila* and  
953 mosquito. *J Insect Physiol*. Elsevier Ltd; 2013;59: 159–170.  
954 doi:10.1016/j.jinsphys.2012.07.004
- 955 52. Lan Q, Fallon M. Small heat shock proteins distinguish between two mosquito species  
956 and confirm identity of their cell lines. *Am J Trop Med Hyg*. 1990;43: 669–676.
- 957 53. Walker T, Jeffries CL, Mansfield KL, Johnson N. Mosquito cell lines: history, isolation,  
958 availability and application to assess the threat of arboviral transmission in the United  
959 Kingdom. *Parasit Vectors*. 2014;7: 382. doi:10.1186/1756-3305-7-382
- 960 54. Morazzani EM, Wiley MR, Murreddu MG, Adelman ZN, Myles KM. Production of virus-  
961 derived ping-pong-dependent piRNA-like small RNAs in the mosquito soma. Ding S-W,  
962 editor. *PLoS Pathog*. Public Library of Science; 2012;8: e1002470.  
963 doi:10.1371/journal.ppat.1002470
- 964 55. Stollar V, Thomas VL. An agent in the *Aedes aegypti* cell line (Peleg) which causes  
965 fusion of *Aedes albopictus* cells. *Virology*. 1975;64: 367–377.
- 966 56. Weger-Lucarelli J, Rückert C, Grubaugh ND, Misencik MJ, Armstrong PM, Stenglein  
967 MD, et al. Adventitious viruses persistently infect three commonly used mosquito cell  
968 lines. *Virology*. 2018;521: 175–180. doi:10.1016/j.virol.2018.06.007

- 969 57. Maringer K, Yousuf A, Heesom KJ, Fan J, Lee D, Fernandez-Sesma A, et al.  
970 Proteomics informed by transcriptomics for characterising active transposable  
971 elements and genome annotation in *Aedes aegypti*. *BMC Genomics*. *BMC Genomics*;  
972 2017;18: 1–18. doi:10.1186/s12864-016-3432-5
- 973 58. Franzke K, Leggewie M, Sreenu VB, Jansen S, Heitmann A, Welch SR, et al. Detection,  
974 infection dynamics and small RNA response against *Culex* Y virus in mosquito-derived  
975 cells. *J Gen Virol*. 2018;99: 1739–1745. doi:10.1099/jgv.0.001173
- 976 59. Varjak M, Maringer K, Watson M, Sreenu VB, Fredericks AC, Pondeville E, et al. *Aedes*  
977 *aegypti* Piwi4 Is a Noncanonical PIWI Protein Involved in Antiviral Responses. Duprex  
978 WP, editor. *American Society for Microbiology Journals*; 2017;2: e00144–17.  
979 doi:10.1128/mSphere.00144-17
- 980 60. Varjak M, Donald CL, Mottram TJ, Sreenu VB, Merits A, Maringer K, et al.  
981 Characterization of the Zika virus induced small RNA response in *Aedes aegypti* cells.  
982 Olson KE, editor. *PLoS Negl Trop Dis*. Public Library of Science; 2017;11: e0006010.  
983 doi:10.1371/journal.pntd.0006010
- 984 61. Halstead SB, Simasthien P. Observations related to the pathogenesis of dengue  
985 hemorrhagic fever. II. Antigenic and biologic properties of dengue viruses and their  
986 association with disease response in the host. *Yale Journal of Biology and Medicine*.  
987 1970;42: 276–292.
- 988 62. Dick GWA, Kitchen SF, Haddow AJ. Zika virus. I. Isolations and serological specificity.  
989 *Transactions of the Royal Society of Tropical Medicine and Hygiene*. 1952;46: 509–  
990 520.
- 991 63. Levine B, Goldman JE, Jiang HH, Griffin DE, Hardwick JM. Bc1-2 protects mice against  
992 fatal alphavirus encephalitis. *Proc Natl Acad Sci USA*. 1996;93: 4810–4815.



- 993 64. Hardwick M, Levine B. Sindbis virus vector system for functional analysis of apoptosis  
994 regulators. *Methods in Enzymology*. 2013;322: 1–17.
- 995 65. Stojdl DF, Lichty BD, tenOever BR, Paterson JM, Power AT, Knowles S, et al. VSV  
996 strains with defects in their ability to shutdown innate immunity are potent systemic anti-  
997 cancer agents. *Cancer Cell*. 2003;4: 263–275. doi:10.1016/S1535-6108(03)00241-1
- 998 66. Park MS, Shaw ML, Munoz-Jordan J, Cros JF, Nakaya T, Bouvier N, et al. Newcastle  
999 Disease Virus (NDV)-Based Assay Demonstrates Interferon-Antagonist Activity for the  
1000 NDV V Protein and the Nipah Virus V, W, and C Proteins. *J Virol*. 2003;77: 1501–1511.  
1001 doi:10.1128/JVI.77.2.1501-1511.2003
- 1002 67. Scott JC, Brackney DE, Campbell CL, Bondu-Hawkins V, Hjelle B, Ebel GD, et al.  
1003 Comparison of Dengue Virus Type 2-Specific Small RNAs from RNA Interference-  
1004 Competent and –Incompetent Mosquito Cells. O'Neill SL, editor. *PLoS Negl Trop Dis*.  
1005 2010;4: e848. doi:10.1371/journal.pntd.0000848.t002
- 1006 68. Anderson MAE, Gross TL, Myles KM, Adelman ZN. Validation of novel promoter  
1007 sequences derived from two endogenous ubiquitin genes in transgenic *Aedes aegypti*.  
1008 *Insect Molecular Biology*. 2010;19: 441–449. doi:10.1111/j.1365-2583.2010.01005.x
- 1009 69. Schindelin J, Arganda-Carreras I, Frise E, Kaynig V, Longair M, Pietzsch T, et al. Fiji:  
1010 an open-source platform for biological-image analysis. *Nature Methods*. Nature  
1011 Publishing Group; 2012;9: 676–682. doi:10.1038/nmeth.2019
- 1012 70. Whitfield ZJ, Dolan PT, Kunitomi M, Tassetto M, Seetin MG, Oh S, et al. The Diversity,  
1013 Structure, and Function of Heritable Adaptive Immunity Sequences in the *Aedes*  
1014 *aegypti* Genome. *Curr Biol*. 2017;27: 3511–3519.e7. doi:10.1016/j.cub.2017.09.067
- 1015 71. Giraldo-Calderón GI, Emrich SJ, Maccallum RM, Maslen G, Dialynas E, Topalis P, et  
1016 al. VectorBase: an updated bioinformatics resource for invertebrate vectors and other

- 1017 organisms related with human diseases. *Nucleic Acids Research*. Oxford University  
1018 Press; 2015;43: D707–13. doi:10.1093/nar/gku1117
- 1019 72. Goic B, Vodovar N, Mondotte JA, Monot C, Frangeul L, Blanc H, et al. RNA-mediated  
1020 interference and reverse transcription control the persistence of RNA viruses in the  
1021 insect model *Drosophila*. *Nature Immunology*. 2013;14: 396–403. doi:10.1038/ni.2542
- 1022 73. Goic B, Stapleford KA, Frangeul L, Doucet AJ, Gausson V, Blanc H, et al. Virus-derived  
1023 DNA drives mosquito vector tolerance to arboviral infection. *Nat Commun*. 2016;7:  
1024 12410. doi:10.1038/ncomms12410
- 1025 74. Horst Ter AM, Nigg JC, Dekker FM, Falk BW. Endogenous viral elements are  
1026 widespread in arthropod genomes and commonly give rise to piRNAs. *J Virol*. American  
1027 Society for Microbiology Journals; 2018;: JVI.02124–18. doi:10.1128/JVI.02124-18
- 1028 75. Palatini U, Miesen P, Carballar-Lejarazú R, Ometto L, Rizzo E, Tu Z, et al. Comparative  
1029 genomics shows that viral integrations are abundant and express piRNAs in the  
1030 arboviral vectors *Aedes aegypti* and *Aedes albopictus*. *BMC Genomics*. BioMed  
1031 Central; 2017;18: 512. doi:10.1186/s12864-017-3903-3
- 1032 76. Suzuki Y, Frangeul L, Dickson LB, Blanc H, Verdier Y, Vinh J, et al. Uncovering the  
1033 repertoire of endogenous flaviviral elements in *Aedes* mosquito genomes. *J Virol*.  
1034 American Society for Microbiology; 2017;: JVI.00571–17. doi:10.1128/JVI.00571-17
- 1035 77. Crochu S, Cook S, Attoui H, Charrel RN, De Chesse R, Belhouchet M, et al. Sequences  
1036 of flavivirus-related RNA viruses persist in DNA form integrated in the genome of *Aedes*  
1037 spp. mosquitoes. *J Gen Virol*. 2004;85: 1971–1980. doi:10.1099/vir.0.79850-0
- 1038 78. Mullane K, Williams M. Enhancing reproducibility: Failures from Reproducibility  
1039 Initiatives underline core challenges. *Biochem Pharmacol*. 2017;138: 7–18.  
1040 doi:10.1016/j.bcp.2017.04.008

1041 79. van Cleef KWR, van Mierlo JT, Miesen P, Overheul GJ, Fros JJ, Schuster S, et al.  
1042 Mosquito and Drosophila entomobirnaviruses suppress dsRNA- and siRNA-induced  
1043 RNAi. *Nucleic Acids Research*. 2014;42: 8732–8744. doi:10.1093/nar/gku528

1044

1045

1046

1047

1048

1049

1050

1051

1052

1053

1054

1055

1056

1057

1058

1059

1060

1061

FIGURE 1

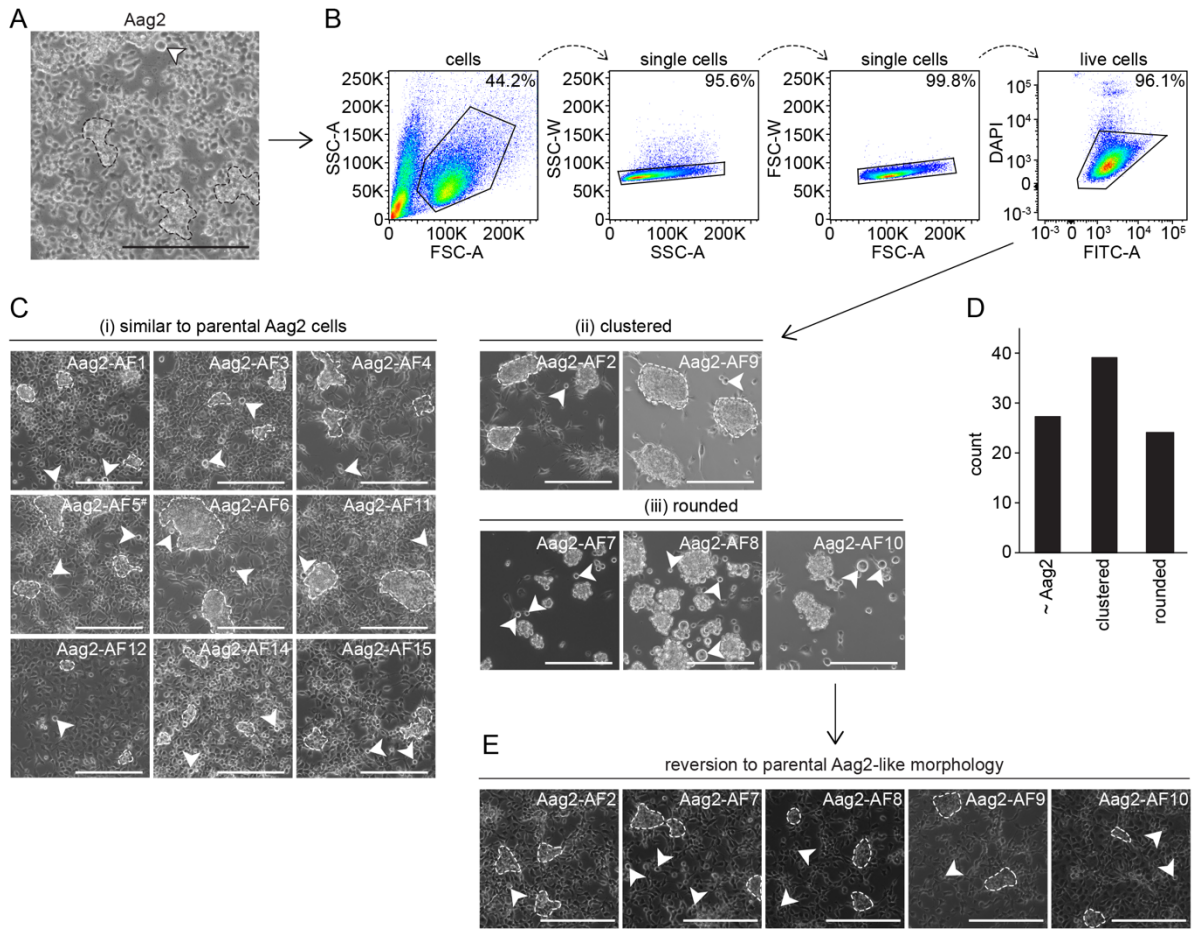

1062

1063

1064

1065

1066

1067

1068

1069

1070

1071

FIGURE 2

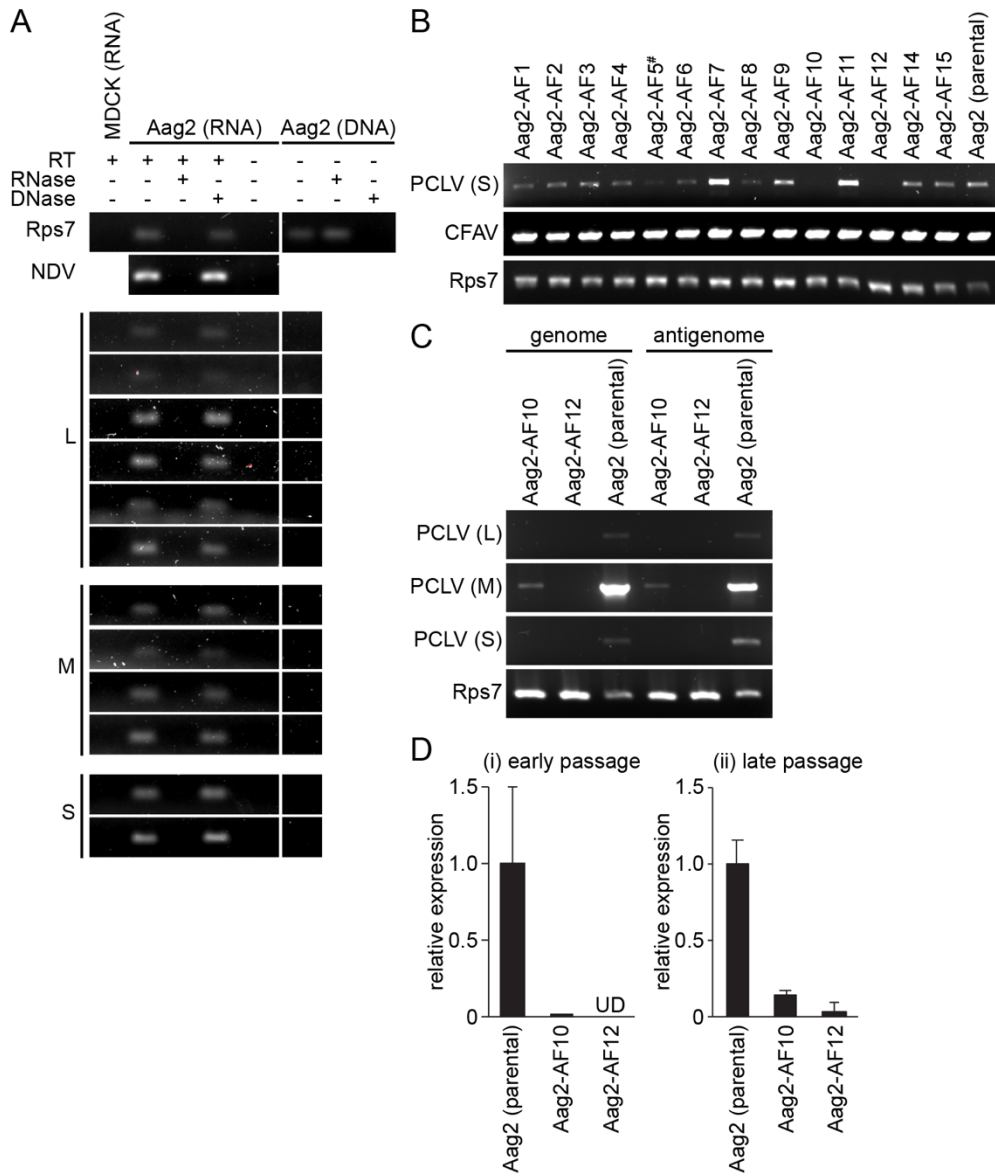

1072

1073

1074

1075

1076

1077

1078

FIGURE 3

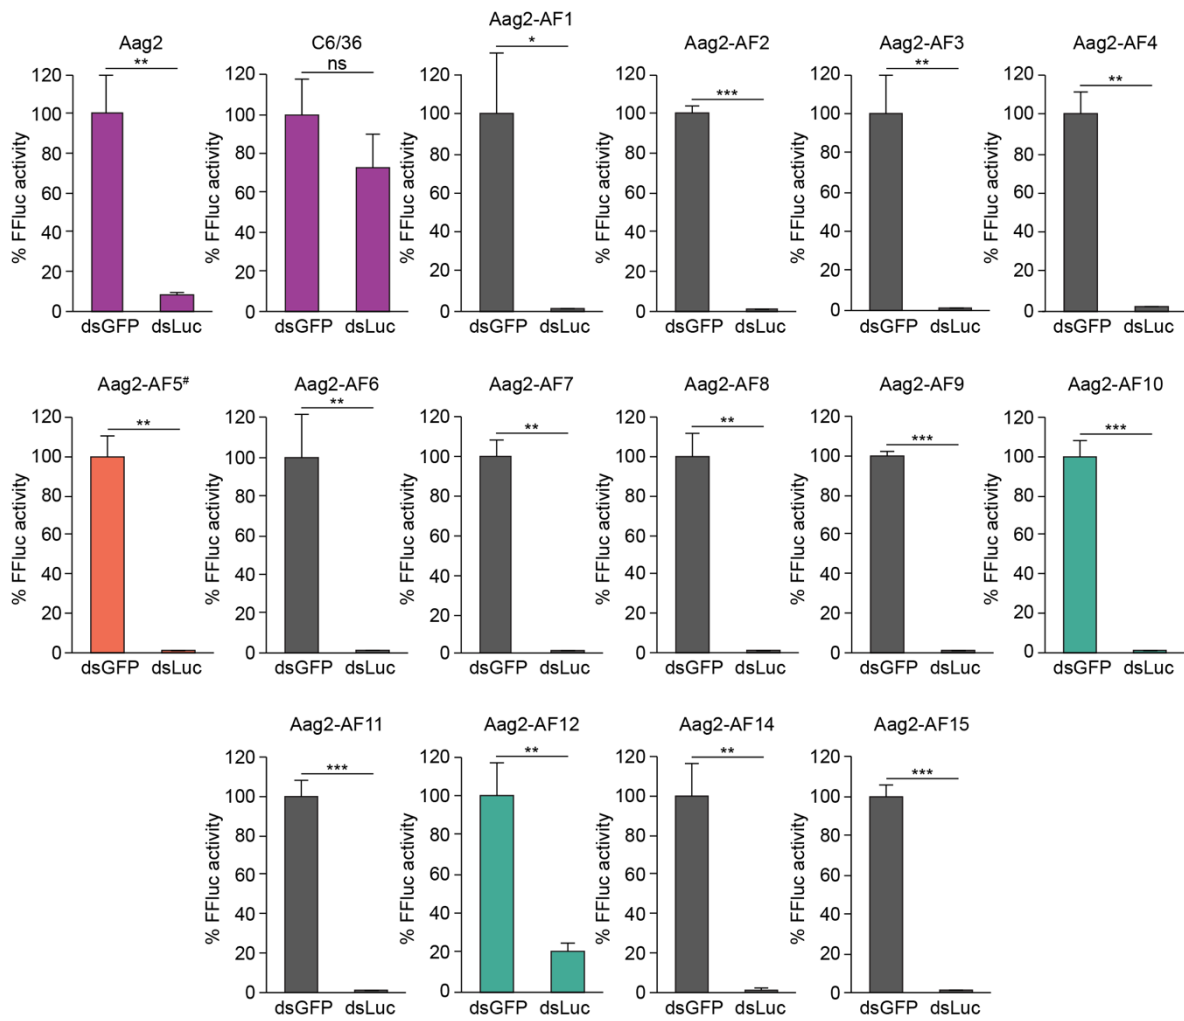

1079

1080

1081

1082

1083

1084

1085

1086

1087

FIGURE 4

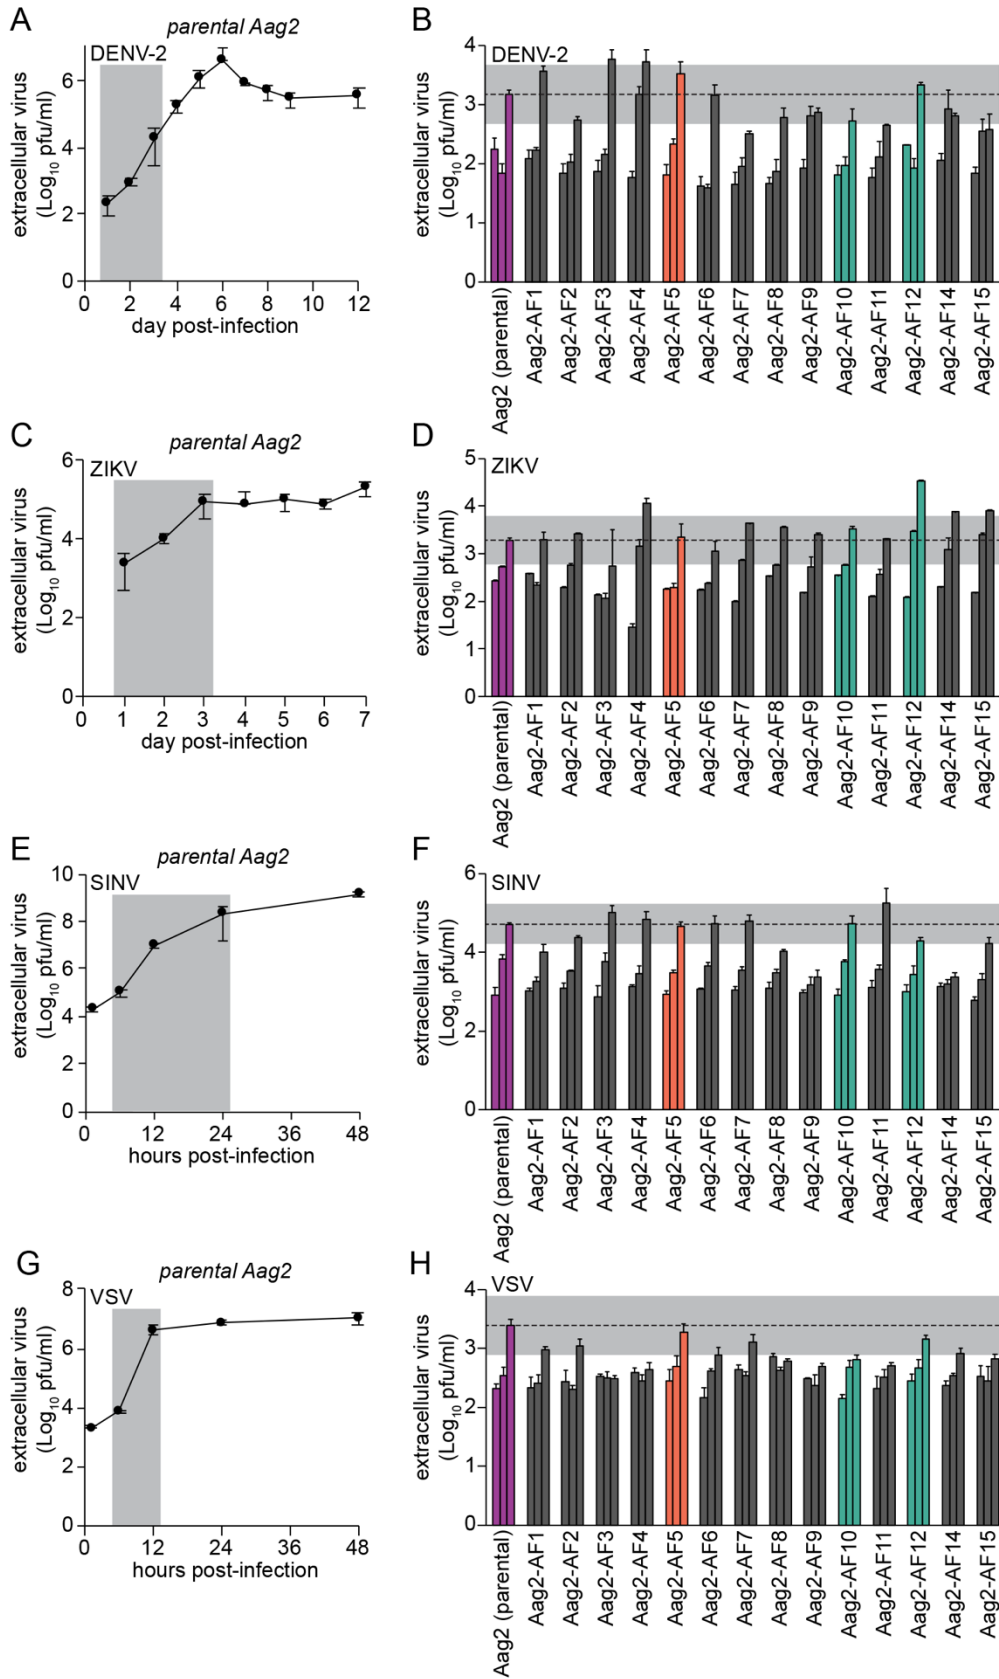

1088

1089

FIGURE 5

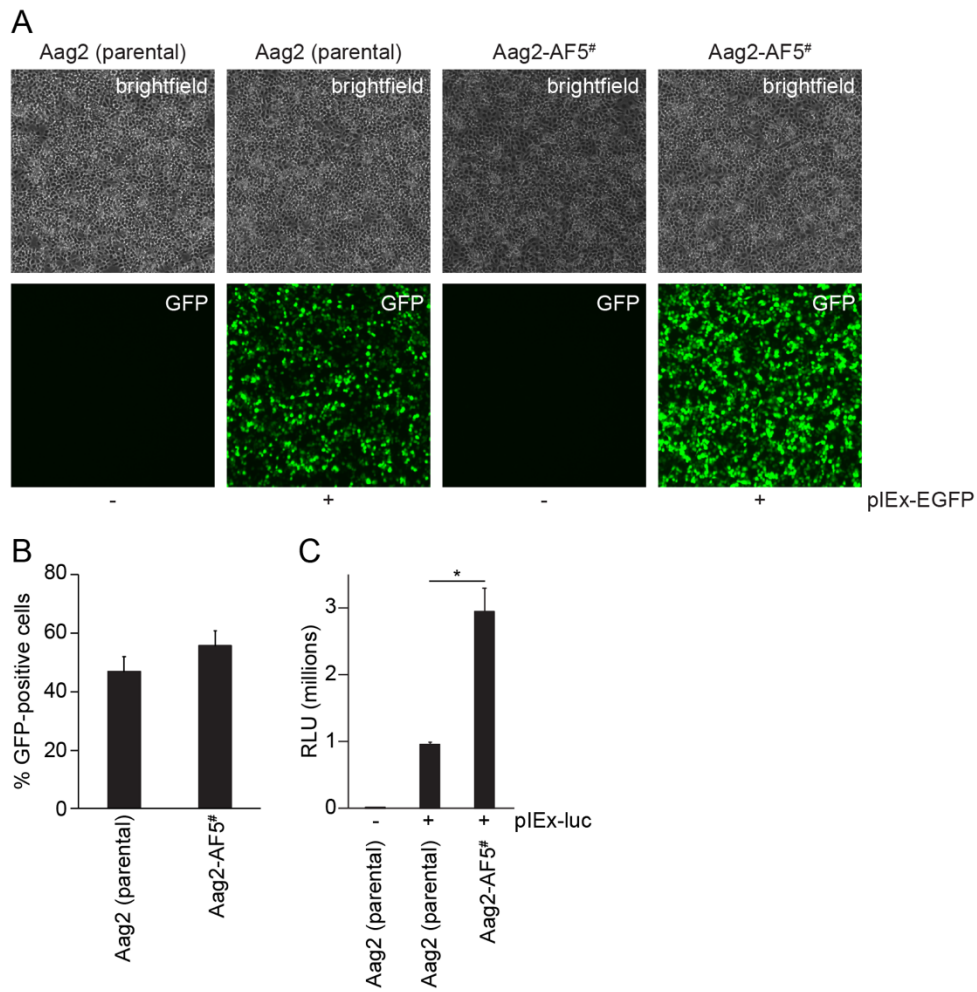

1090

1091

1092

1093

1094

1095

1096

1097



1098

FIGURE 6

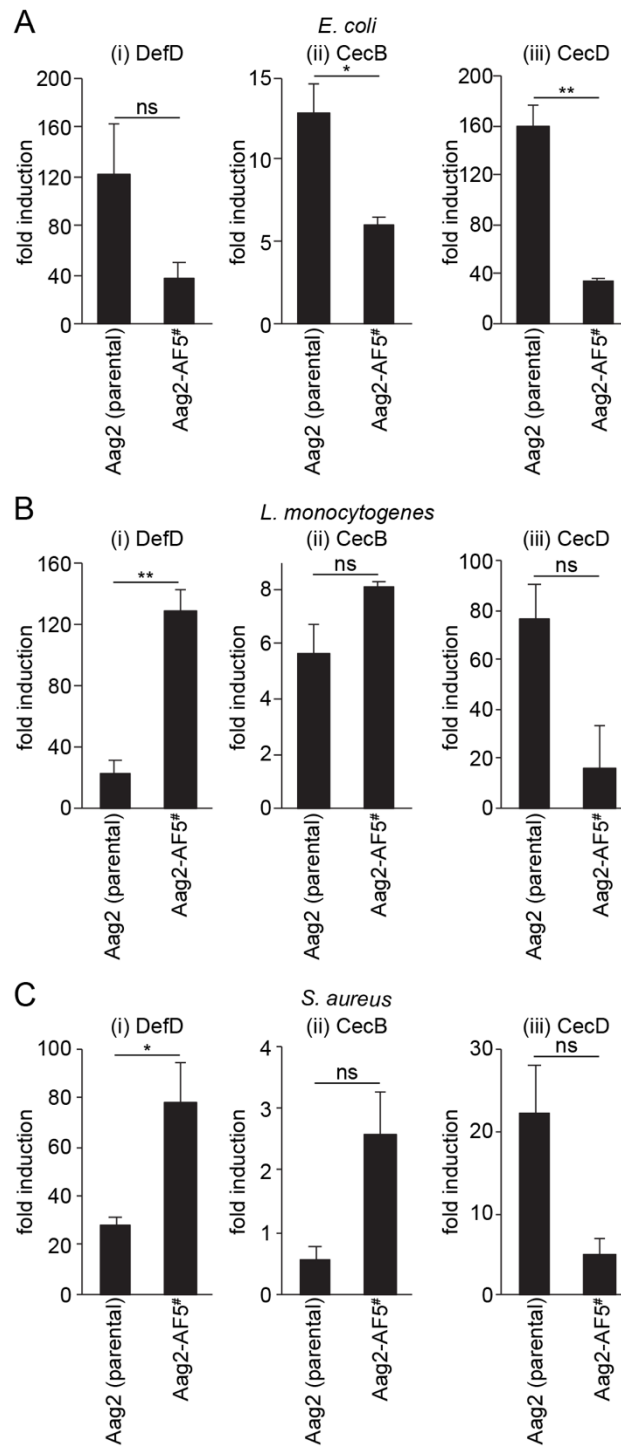

1099

1100

1101

1102
